# Supplementary material for: Chia flour combined with a high fat diet increases propionic acid production and improves the microbial richness and diversity in female Wistar rats
Source: Royal Society of Chemistry journal article supplement (doi:10.1039/d3fo01764h), 2023-01-01
Supplement: d3fo01764h1.xlsx [file d3fo01764h1.xlsx]

## Sheet: biometrics
		Final body weight	Weight gain	Cecum weight	Cecal Index	Total food intake (g)	Total energy intake (kcal)
SD		280.1	190.7	2.95	1.0532	712.45	2678.81
		297.9	211.6	3.47	1.16482	792.51	2979.84
		264.5	169.1	2.3	0.869565	693.62	2608.01
		275.7	169.4	3.26	1.18244	697.64	2623.13
		274	188.3	5.31	1.93796	705.39	2652.27
		269.4	185.2	5.57	2.06756	676.7	2544.39
		283.6	196.1	4.9	1.72779	743.23	2794.54
		299.4	211.5	4.55	1.51971	774.54	2912.27
	Media	280.575	190.238	4.03875	1.44038	724.51	2724.16
	Standard Deviation	12.6163	16.2707	1.20134	0.438835	41.3184	155.357
SDC		280.1	184.7	4.35	1.55302	800.72	2970.67
		334.6	232.1	4.94	1.47639	787.81	2922.78
		279.7	180.8	5.4	1.93064	729.33	2705.81
		277.5	170.3	4.85	1.74775	870.97	3231.3
		278.3	203.8	3.06	1.09953	873.34	3240.09
		292.5	189.3	5.21	1.7812	779.53	2892.06
		315.4	207	3.6	1.14141	831.68	3085.53
		293.8	150.9			731.27	2713.01
	Media	293.988	189.863	4.48714	1.53285	800.581	2970.16
	Standard Deviation	20.7882	24.7323	0.8694	0.31903	55.681	206.576
HFD		329.4	235.3	2.9	0.880389	661.44	3128.61
		267.3	182.6	3.57	1.25572	587.76	2780.1
		284.3	187.5	4	1.49533	579.39	2740.51
		267.5	230.6	3.58	1.21727	657.54	3110.16
		294.1	161.2	2.28	0.797761	596.67	2822.25
		285.8	186.5	4.05	1.33049	570.79	2699.84
		304.4	178.4	3.42	1.25183	615.92	2913.3
		273.2	193.1			741.04	3505.12
	Media	288.25	194.4	3.4	1.17554	626.319	2962.49
	Standard Deviation	21.7833	25.6137	0.685293	0.269556	57.4816	271.888
		274.9	179.2	5.27	1.91706	583.35	2735.91
HFDC		330.6	236.2	2.57	2.18237	698.01	3273.67
		262.1	158.3	5.72	1.60357	565.67	2652.99
		280	174.6	4.49	1.56357	587.41	2754.95
		291	181.1	4.55	1.04401	643.29	3017.03
		293.1	188.8	3.06	1.29994	627.91	2944.9
		325.4	227.1	4.23	1.16913	667.5	3130.58
		304.5	192	3.56		645.36	3026.74
	Media	295.2	192.163	4.18125	1.53995	627.312	2942.1
	Standard Deviation	23.9418	26.5028	1.07079	0.408369	45.5431	213.597

## Sheet: pH
		pH
SD		9.21
		9.11
		9.38
		8.88
		9.43
		9.64
		9.32
	Media	9.28143
	Standard Deviation	0.244092
SDC		9.22
		8.93
		9.18
		7.99
		8.37
		8.7
		8.8
		9.07
	Media	8.7825
	Standard Deviation	0.424121
HFD		8.77
		8.92
		8.82
		9.57
		8.73
		8.98
		8.77
		9.72
	Media	9.035
	Standard Deviation	0.387556
HFDC		8.96
		8.54
		8.39
		8.61
		8.85
		7.85
		8.12
		8.07
	Media	8.42375
	Standard Deviation	0.390089

## Sheet: IgA
		Grupos	Abs	Equação		CURVA		Conc. [ ng/ml IGA]	ABS
SD		1	0.83	572.167		C1	0.49	1200	0.49
		2	0.72	755.5		C1		600
		3	0.973	333.833		C2	0.705	300
		4	0.753	700.5		C2	0.694	150	1.104
		5	0.86	522.167		C3		75	1.1335
		6	0.784	648.833		C3		37.5	1.135
		7	0.832	568.833		C4	1.064
	Media			628		C4	1.144
	Standard Deviation			89.1799		C5	1.134
						C5	1.133
SDC		1	0.759	690.5		C6	1.135
		2	1.16	22.1667		C6
		3	1.065	180.5				Equação	0,0006x + 1,1733
		4	0.986	312.167
		5	0.688	808.833
		6	0.91	438.833
		7	1.236	-104.5
	Media			562.583
	Standard Deviation			227.321
HFD		1	0.725	747.167
		2	1.111	103.833
		3	0.776	662.167
		4	1.197	-39.5
		5	1.086	145.5
		6	1.776	-1004.5
		7	0.702	785.5
	Media			731.611
	Standard Deviation			63.121
HFDC		1	1.255	-136.167
		2	0.997	293.833
		3	1.287	-189.5
		4	0.912	435.5
		5	1.55	-627.833
		6	0.846	545.5
		7	1.06	188.833
	Media			424.944
	Standard Deviation			126.165

## Sheet: SCFA
		Acetic acid	Propionic acid	Butyric acid
SD		8.21	82.32	0.87
		9.04	6.3	1.43
		11.08	9.48	0.82
		8.88	3.07	0.54
		8.99	2.31	0.54
		10.24	3.29	0.84
		11.33	2.69	1.08
		9.93	1.03	0.61
	Media	9.7125	4.52333	0.941667
	Standard Deviation	1.11719	2.8149	0.282093
SDC		8.75	1.58	0.93
		14.99	3.47	1.97
		15.1	3.76	1.29
		8.69	0.09	1.17
		15.23	1.81	1.57
		8.71	2.31	0.73
		16.81	4.15	2
		12.01		1.3
	Media	12.5363	2.84667	1.46143
	Standard Deviation	3.42598	1.08522	0.404822
HFD		5.97	1.42	1.16
		9.8	1.64	0.83
		11.01	0.02	1.46
		7.07	1.51	0.42
		13.58	0.01	1.59
		10.03	1.32	1.21
		9.08	1.28	1.35
		9.13	1.81	1.12
	Media	9.45875	1.49667	1.24571
	Standard Deviation	2.32879	0.201461	0.249189
HFDC		7.65	1.6	0.75
		7.79	2.02	1.49
		10.68	2.88	1.12
		9.56	2.36	1.48
		10.28	2.68	1.6
		8.21	3.28	0.98
		10.75	3.32	1.6
		9.43	3.44	1.33
	Media	9.29375	2.85429	1.37143
	Standard Deviation	1.26729	0.534255	0.241

## Sheet: Functionality
		AP	PepT1	SGLT1	SI
SD		1	1	1	1
		1	1	1	1
		1	1	1	1
		1	1	1	1
	Media	1	1	1	1
	Standard Deviation	0	0	0	0
SDC		8.47	0.33	0.23	2.19
		13.66	0.54	0.21	1.94
		10.79	0.45	0.22	2.22
					2.49
	Media	10.9733	0.44	0.22	2.21
	Standard Deviation	2.59985	0.105357	0.01	0.224944
HFD		0.3	0.03	0.03	2.15
		0.79	0.02	0.04	1.43
		0.82	0	0	1.26
	Media	0.636667	0.0166667	0.0233333	1.61333
	Standard Deviation	0.291947	0.0152753	0.0208167	0.472476
HFDC		5.23	0.29	0.05	1.77
		5.57	0.24	0.02	1.19
		5.53	0.23	0.01	1.66
		5.45	0.24	0.05
	Media	5.445	0.25	0.0325	1.54
	Standard Deviation	0.151767	0.0270801	0.0206155	0.308058

## Sheet: Phylum
taxon	p-values	p-values (corrected)	Effect size	HF: mean rel, freq, (%)	HF: std, dev, (%)	HFC: mean rel, freq, (%)	HFC: std, dev, (%)	ST: mean rel, freq, (%)	ST: std, dev, (%)	STC: mean rel, freq, (%)	STC: std, dev, (%)	HS116	HS116: parent seq, count	HS116: rel, freq, (%)	HS117	HS117: parent seq, count	HS117: rel, freq, (%)	HS118	HS118: parent seq, count	HS118: rel, freq, (%)	HS119	HS119: parent seq, count	HS119: rel, freq, (%)	HS120	HS120: parent seq, count	HS120: rel, freq, (%)	HS121	HS121: parent seq, count	HS121: rel, freq, (%)	HS122	HS122: parent seq, count	HS122: rel, freq, (%)	HS123	HS123: parent seq, count	HS123: rel, freq, (%)	HS124	HS124: parent seq, count	HS124: rel, freq, (%)	HS125	HS125: parent seq, count	HS125: rel, freq, (%)	HS126	HS126: parent seq, count	HS126: rel, freq, (%)	HS127	HS127: parent seq, count	HS127: rel, freq, (%)	HS092	HS092: parent seq, count
Firmicutes	0.725969	0.829679	0.0360371	77.5339	2.55539	78.8605	2.63043	76.8744	4.707	77.5374	4.4835	252	329	76.5957	219	282	77.6596	190	233	81.5451	216	271	79.7048	245	322	76.087	212	288	73.6111	208	280	74.2857	273	355	76.9014	283	361	78.3934	374	459	81.4815	316	389	81.2339	317	392	80.8673	289	360
Bacteroidetes	0.926151	0.987895	0.015947	12.9101	2.14731	12.053	1.81681	12.9145	3.94901	12.777	2.81617	36	329	10.9422	33	282	11.7021	29	233	12.4464	30	271	11.0701	46	322	14.2857	49	288	17.0139	39	280	13.9286	49	355	13.8028	49	361	13.5734	46	459	10.0218	37	389	9.51157	45	392	11.4796	37	360
Actinobacteria	0.531948	0.773743	0.128969	4.1972	1.06304	3.90617	0.383184	3.42344	0.836992	4.08462	0.61901	21	329	6.38298	10	282	3.5461	8	233	3.43348	10	271	3.69004	15	322	4.65839	10	288	3.47222	10	280	3.57143	14	355	3.94366	14	361	3.87812	20	459	4.3573	17	389	4.37018	13	392	3.31633	13	360
Desulfobacterota	0.302232	0.967143	0.170658	2.79491	1.04154	2.83251	0.921879	3.75294	0.906876	2.69587	0.883809	13	329	3.95137	11	282	3.90071	3	233	1.28755	8	271	2.95203	5	322	1.5528	9	288	3.125	12	280	4.28571	13	355	3.66197	8	361	2.21607	9	459	1.96078	12	389	3.08483	7	392	1.78571	12	360
Proteobacteria	0.472886	0.756618	0.109611	1.96247	0.600641	1.39904	0.54159	1.57871	0.229149	1.72525	0.822626	4	329	1.21581	8	282	2.83688	3	233	1.28755	6	271	2.21402	8	322	2.48447	5	288	1.73611	7	280	2.5	5	355	1.40845	5	361	1.38504	6	459	1.30719	4	389	1.02828	3	392	0.765306	5	360
Campilobacterota	0.356243	0.814271	0.144875	0.338761	0.201843	0.240392	0.280252	0.537977	0.30092	0.323583	0.268447	1	329	0.303951	1	282	0.35461	0	233	0	1	271	0.369004	1	322	0.310559	2	288	0.694444	2	280	0.714286	0	355	0	0	361	0	1	459	0.217865	0	389	0	2	392	0.510204	2	360
Verrucomicrobiota	0.997935	0.997935	0.026369	0.101317	0.226552	0.042517	0.0950709	0.0631313	0.141166	0.0403551	0.0902368	2	329	0.607903	0	282	0	0	233	0	0	271	0	0	322	0	0	288	0	0	280	0	0	355	0	0	361	0	0	459	0	0	389	0	1	392	0.255102	0	360
Fibrobacterota	0.391625	0.78325	0.130435	0.0578704	0.129402	0	0	0	0	0	0	0	329	0	0	282	0	0	233	0	0	271	0	0	322	0	1	288	0.347222	0	280	0	0	355	0	0	361	0	0	459	0	0	389	0	0	392	0	0	360
Patescibacteria	0.334945	0.893186	0.178873	0.0517598	0.115739	0.121673	0.122339	0.055371	0.123813	0.205286	0.166863	0	329	0	0	282	0	0	233	0	0	271	0	1	322	0.310559	0	288	0	0	280	0	0	355	0	0	361	0	1	459	0.217865	1	389	0.257069	1	392	0.255102	0	360
Fusobacteriota	0.300413	1.20165	0.167183	0.0517598	0.115739	0.125324	0.126522	0.0462963	0.103522	0	0	0	329	0	0	282	0	0	233	0	0	271	0	1	322	0.310559	0	288	0	0	280	0	0	355	0	1	361	0.277008	1	459	0.217865	1	389	0.257069	0	392	0	1	360
Chloroflexi	0.00403615	0.0645785	0.566804	0	0	0.231468	0.111588	0.0550055	0.122996	0	0	0	329	0	0	282	0	0	233	0	0	271	0	0	322	0	0	288	0	1	280	0.357143	1	355	0.28169	1	361	0.277008	1	459	0.217865	0	389	0	1	392	0.255102	0	360
Spirochaetota	0.00909551	0.0727641	0.404417	0	0	0.0428449	0.0958041	0.264875	0.120333	0.327335	0.302789	0	329	0	0	282	0	0	233	0	0	271	0	0	322	0	0	288	0	0	280	0	0	355	0	0	361	0	0	459	0	1	389	0.257069	0	392	0	1	360
WPS-2	0.553086	0.680722	0.0923078	0	0	0.042517	0.0950709	0.055371	0.123813	0	0	0	329	0	0	282	0	0	233	0	0	271	0	0	322	0	0	288	0	0	280	0	0	355	0	0	361	0	0	459	0	0	389	0	1	392	0.255102	0	360
Deferribacterota	0.391625	0.696223	0.130435	0	0	0	0	0.055371	0.123813	0	0	0	329	0	0	282	0	0	233	0	0	271	0	0	322	0	0	288	0	0	280	0	0	355	0	0	361	0	0	459	0	0	389	0	0	392	0	0	360
Gemmatimonadota	0.553086	0.737449	0.0922405	0	0	0.042517	0.0950709	0.0550055	0.122996	0	0	0	329	0	0	282	0	0	233	0	0	271	0	0	322	0	0	288	0	0	280	0	0	355	0	0	361	0	0	459	0	0	389	0	1	392	0.255102	0	360
Bacteria_unclassified	0.228638	1.2194	0.170116	0	0	0.0595238	0.133099	0.267631	0.286554	0.283275	0.45154	0	329	0	0	282	0	0	233	0	0	271	0	0	322	0	0	288	0	1	280	0.357143	0	355	0	0	361	0	0	459	0	0	389	0	0	392	0	0	360
[truncated: 34 more columns]

## Sheet: Class
taxon	p-values	p-values (corrected)	Effect size	HF: mean rel, freq, (%)	HF: std, dev, (%)	HFC: mean rel, freq, (%)	HFC: std, dev, (%)	ST: mean rel, freq, (%)	ST: std, dev, (%)	STC: mean rel, freq, (%)	STC: std, dev, (%)	HS116	HS116: parent seq, count	HS116: rel, freq, (%)	HS117	HS117: parent seq, count	HS117: rel, freq, (%)	HS118	HS118: parent seq, count	HS118: rel, freq, (%)	HS119	HS119: parent seq, count	HS119: rel, freq, (%)	HS120	HS120: parent seq, count	HS120: rel, freq, (%)	HS121	HS121: parent seq, count	HS121: rel, freq, (%)	HS122	HS122: parent seq, count	HS122: rel, freq, (%)	HS123	HS123: parent seq, count	HS123: rel, freq, (%)	HS124	HS124: parent seq, count	HS124: rel, freq, (%)	HS125	HS125: parent seq, count	HS125: rel, freq, (%)	HS126	HS126: parent seq, count	HS126: rel, freq, (%)	HS127	HS127: parent seq, count	HS127: rel, freq, (%)	HS092	HS092: parent seq, count
Clostridia	0.397834	0.561647	0.147478	68.4546	2.2967	71.7415	3.2508	68.681	4.30182	70.988	3.55846	232	329	70.5167	189	282	67.0213	167	233	71.6738	189	271	69.7417	213	322	66.1491	189	288	65.625	183	280	65.3571	250	355	70.4225	259	361	71.7452	345	459	75.1634	288	389	74.036	289	392	73.7245	263	360
Bacteroidia	0.926151	0.926151	0.015947	12.9101	2.14731	12.053	1.81681	12.9145	3.94901	12.777	2.81617	36	329	10.9422	33	282	11.7021	29	233	12.4464	30	271	11.0701	46	322	14.2857	49	288	17.0139	39	280	13.9286	49	355	13.8028	49	361	13.5734	46	459	10.0218	37	389	9.51157	45	392	11.4796	37	360
Bacilli	0.111286	0.445145	0.266394	8.05997	1.69943	6.27606	0.946726	7.30602	1.47569	5.92226	1.3788	16	329	4.86322	28	282	9.92908	21	233	9.01288	25	271	9.22509	27	322	8.38509	20	288	6.94444	23	280	8.21429	19	355	5.35211	22	361	6.09418	25	459	5.44662	25	389	6.42674	24	392	6.12245	23	360
Desulfovibrionia	0.302232	0.805952	0.170658	2.79491	1.04154	2.83251	0.921879	3.75294	0.906876	2.69587	0.883809	13	329	3.95137	11	282	3.90071	3	233	1.28755	8	271	2.95203	5	322	1.5528	9	288	3.125	12	280	4.28571	13	355	3.66197	8	361	2.21607	9	459	1.96078	12	389	3.08483	7	392	1.78571	12	360
Coriobacteriia	0.0322832	0.193699	0.315282	2.75299	1.02187	3.30423	0.442736	2.12038	0.559672	3.35691	0.787032	16	329	4.86322	6	282	2.12766	5	233	2.14592	5	271	1.84502	10	322	3.10559	7	288	2.43056	7	280	2.5	12	355	3.38028	12	361	3.3241	17	459	3.7037	15	389	3.85604	12	392	3.06122	9	360
Actinobacteria	0.004934	0.059208	0.501981	1.44421	0.246777	0.601944	0.2432	1.24806	0.561877	0.727712	0.227361	5	329	1.51976	4	282	1.41844	3	233	1.28755	5	271	1.84502	5	322	1.5528	3	288	1.04167	3	280	1.07143	2	355	0.56338	2	361	0.554017	3	459	0.653595	2	389	0.514139	1	392	0.255102	4	360
Gammaproteobacteria	0.727551	0.793692	0.0297073	1.36368	0.706769	1.16725	0.462139	1.41391	0.293186	1.31785	0.557772	3	329	0.911854	6	282	2.12766	1	233	0.429185	5	271	1.84502	7	322	2.17391	2	288	0.694444	6	280	2.14286	4	355	1.12676	4	361	1.10803	5	459	1.08932	3	389	0.771208	3	392	0.765306	4	360
Negativicutes	0.694099	0.793256	0.0567634	0.665302	0.362132	0.553057	0.18944	0.606011	0.41679	0.458002	0.211931	2	329	0.607903	2	282	0.70922	0	233	0	2	271	0.738007	4	322	1.24224	2	288	0.694444	2	280	0.714286	3	355	0.84507	2	361	0.554017	2	459	0.43573	2	389	0.514139	1	392	0.255102	3	360
Alphaproteobacteria	0.0731666	0.3512	0.327241	0.598795	0.288249	0.231796	0.11166	0.164799	0.167364	0.407403	0.331209	1	329	0.303951	2	282	0.70922	2	233	0.858369	1	271	0.369004	1	322	0.310559	3	288	1.04167	1	280	0.357143	1	355	0.28169	1	361	0.277008	1	459	0.217865	1	389	0.257069	0	392	0	1	360
Firmicutes_unclassified	0.656965	0.788358	0.0657159	0.354009	0.308604	0.289966	0.263473	0.281345	0.229353	0.169144	0.185604	2	329	0.607903	0	282	0	2	233	0.858369	0	271	0	1	322	0.310559	1	288	0.347222	0	280	0	1	355	0.28169	0	361	0	2	459	0.43573	1	389	0.257069	3	392	0.765306	0	360
Campylobacteria	0.356243	0.777258	0.144875	0.338761	0.201843	0.240392	0.280252	0.537977	0.30092	0.323583	0.268447	1	329	0.303951	1	282	0.35461	0	233	0	1	271	0.369004	1	322	0.310559	2	288	0.694444	2	280	0.714286	0	355	0	0	361	0	1	459	0.217865	0	389	0	2	392	0.510204	2	360
Verrucomicrobiae	0.774745	0.80843	0.0624665	0.101317	0.226552	0.042517	0.0950709	0.0631313	0.141166	0	0	2	329	0.607903	0	282	0	0	233	0	0	271	0	0	322	0	0	288	0	0	280	0	0	355	0	0	361	0	0	459	0	0	389	0	1	392	0.255102	0	360
Fibrobacteria	0.391625	0.6266	0.130435	0.0578704	0.129402	0	0	0	0	0	0	0	329	0	0	282	0	0	233	0	0	271	0	0	322	0	1	288	0.347222	0	280	0	0	355	0	0	361	0	0	459	0	0	389	0	0	392	0	0	360
Saccharimonadia	0.334945	0.803867	0.178873	0.0517598	0.115739	0.121673	0.122339	0.055371	0.123813	0.205286	0.166863	0	329	0	0	282	0	0	233	0	0	271	0	1	322	0.310559	0	288	0	0	280	0	0	355	0	0	361	0	1	459	0.217865	1	389	0.257069	1	392	0.255102	0	360
Fusobacteriia	0.300413	0.901239	0.167183	0.0517598	0.115739	0.125324	0.126522	0.0462963	0.103522	0	0	0	329	0	0	282	0	0	233	0	0	271	0	1	322	0.310559	0	288	0	0	280	0	0	355	0	1	361	0.277008	1	459	0.217865	1	389	0.257069	0	392	0	1	360
AD3	0.000473479	0.0113635	0.763429	0	0	0.231468	0.111588	0	0	0	0	0	329	0	0	282	0	0	233	0	0	271	0	0	322	0	0	288	0	1	280	0.357143	1	355	0.28169	1	361	0.277008	1	459	0.217865	0	389	0	1	392	0.255102	0	360
Spirochaetia	0.00909551	0.0727641	0.404417	0	0	0.0428449	0.0958041	0.264875	0.120333	0.327335	0.302789	0	329	0	0	282	0	0	233	0	0	271	0	0	322	0	0	288	0	0	280	0	0	355	0	0	361	0	0	459	0	1	389	0.257069	0	392	0	1	360
Chlamydiae	0.391625	0.587438	0.130435	0	0	0	0	0	0	0.0403551	0.0902368	0	329	0	0	282	0	0	233	0	0	271	0	0	322	0	0	288	0	0	280	0	0	355	0	0	361	0	0	459	0	0	389	0	0	392	0	0	360
MB-A2-108	0.391625	0.671357	0.130435	0	0	0	0	0.0550055	0.122996	0	0	0	329	0	0	282	0	0	233	0	0	271	0	0	322	0	0	288	0	0	280	0	0	355	0	0	361	0	0	459	0	0	389	0	0	392	0	0	360
WPS-2_cl	0.553086	0.698636	0.0923078	0	0	0.042517	0.0950709	0.055371	0.123813	0	0	0	329	0	0	282	0	0	233	0	0	271	0	0	322	0	0	288	0	0	280	0	0	355	0	0	361	0	0	459	0	0	389	0	1	392	0.255102	0	360
Anaerolineae	0.391625	0.723	0.130435	0	0	0	0	0.0550055	0.122996	0	0	0	329	0	0	282	0	0	233	0	0	271	0	0	322	0	0	288	0	0	280	0	0	355	0	0	361	0	0	459	0	0	389	0	0	392	0	0	360
Gemmatimonadetes	0.553086	0.737449	0.0922405	0	0	0.042517	0.0950709	0.0550055	0.122996	0	0	0	329	0	0	282	0	0	233	0	0	271	0	0	322	0	0	288	0	0	280	0	0	355	0	0	361	0	0	459	0	0	389	0	1	392	0.255102	0	360
Deferribacteres	0.391625	0.78325	0.130435	0	0	0	0	0.055371	0.123813	0	0	0	329	0	0	282	0	0	233	0	0	271	0	0	322	0	0	288	0	0	280	0	0	355	0	0	361	0	0	459	0	0	389	0	0	392	0	0	360
Bacteria_unclassified	0.228638	0.783901	0.170116	0	0	0.0595238	0.133099	0.267631	0.286554	0.283275	0.45154	0	329	0	0	282	0	0	233	0	0	271	0	0	322	0	0	288	0	1	280	0.357143	0	355	0	0	361	0	0	459	0	0	389	0	0	392	0	0	360
[truncated: 34 more columns]

## Sheet: Order
taxon	p-values	p-values (corrected)	Effect size	HF: mean rel, freq, (%)	HF: std, dev, (%)	HFC: mean rel, freq, (%)	HFC: std, dev, (%)	ST: mean rel, freq, (%)	ST: std, dev, (%)	STC: mean rel, freq, (%)	STC: std, dev, (%)	HS116	HS116: parent seq, count	HS116: rel, freq, (%)	HS117	HS117: parent seq, count	HS117: rel, freq, (%)	HS118	HS118: parent seq, count	HS118: rel, freq, (%)	HS119	HS119: parent seq, count	HS119: rel, freq, (%)	HS120	HS120: parent seq, count	HS120: rel, freq, (%)	HS121	HS121: parent seq, count	HS121: rel, freq, (%)	HS122	HS122: parent seq, count	HS122: rel, freq, (%)	HS123	HS123: parent seq, count	HS123: rel, freq, (%)	HS124	HS124: parent seq, count	HS124: rel, freq, (%)	HS125	HS125: parent seq, count	HS125: rel, freq, (%)	HS126	HS126: parent seq, count	HS126: rel, freq, (%)	HS127	HS127: parent seq, count	HS127: rel, freq, (%)	HS092	HS092: parent seq, count
Lachnospirales	0.0618152	0.331554	0.345091	35.3903	2.59494	37.2695	2.79654	30.8988	4.05114	35.1963	3.21795	130	329	39.5137	93	282	32.9787	87	233	37.3391	99	271	36.5314	104	322	32.2981	97	288	33.6806	94	280	33.5714	134	355	37.7465	153	361	42.3823	173	459	37.6906	146	389	37.5321	136	392	34.6939	132	360
Oscillospirales	0.0755992	0.371696	0.309222	23.9765	1.36586	24.7085	2.69448	27.251	1.98861	25.9163	0.853303	72	329	21.8845	69	282	24.4681	52	233	22.3176	67	271	24.7232	82	322	25.4658	72	288	25	61	280	21.7857	92	355	25.9155	74	361	20.4986	123	459	26.7974	98	389	25.1928	110	392	28.0612	102	360
Bacteroidales	0.893373	0.893373	0.0195463	12.9101	2.14731	11.9235	1.77786	12.766	3.87563	12.777	2.81617	36	329	10.9422	33	282	11.7021	29	233	12.4464	30	271	11.0701	46	322	14.2857	49	288	17.0139	39	280	13.9286	48	355	13.5211	48	361	13.2964	45	459	9.80392	37	389	9.51157	45	392	11.4796	36	360
Erysipelotrichales	0.0797187	0.3618	0.313979	4.74993	1.30516	3.78284	0.646338	4.17486	0.94764	2.99893	0.722474	7	329	2.12766	15	282	5.31915	10	233	4.29185	17	271	6.27306	17	322	5.2795	15	288	5.20833	13	280	4.64286	12	355	3.38028	15	361	4.15512	13	459	2.83224	17	389	4.37018	13	392	3.31633	14	360
Peptostreptococcales-Tissierellales	0.852653	0.867354	0.108935	3.34546	0.455628	3.24047	0.72573	3.85296	0.978847	3.40034	0.318376	10	329	3.03951	9	282	3.19149	9	233	3.86266	11	271	4.05904	9	322	2.79503	9	288	3.125	12	280	4.28571	10	355	2.8169	7	361	1.93906	16	459	3.48584	14	389	3.59897	13	392	3.31633	12	360
Desulfovibrionales	0.302232	0.660433	0.170658	2.79491	1.04154	2.83251	0.921879	3.75294	0.906876	2.69587	0.883809	13	329	3.95137	11	282	3.90071	3	233	1.28755	8	271	2.95203	5	322	1.5528	9	288	3.125	12	280	4.28571	13	355	3.66197	8	361	2.21607	9	459	1.96078	12	389	3.08483	7	392	1.78571	12	360
Coriobacteriales	0.0322832	0.380942	0.315282	2.75299	1.02187	3.30423	0.442736	2.12038	0.559672	3.35691	0.787032	16	329	4.86322	6	282	2.12766	5	233	2.14592	5	271	1.84502	10	322	3.10559	7	288	2.43056	7	280	2.5	12	355	3.38028	12	361	3.3241	17	459	3.7037	15	389	3.85604	12	392	3.06122	9	360
Lactobacillales	0.338471	0.66566	0.143108	2.15303	0.773454	1.64649	0.423495	2.08196	1.0174	1.45128	0.502442	7	329	2.12766	9	282	3.19149	6	233	2.57511	5	271	1.84502	8	322	2.48447	2	288	0.694444	7	280	2.5	6	355	1.69014	5	361	1.38504	8	459	1.74292	5	389	1.28535	5	392	1.27551	7	360
Clostridia_UCG-014	0.67307	0.735391	0.0892667	1.82934	0.995013	2.21998	0.649628	2.19433	0.929059	2.68009	1.20138	5	329	1.51976	6	282	2.12766	8	233	3.43348	1	271	0.369004	8	322	2.48447	3	288	1.04167	5	280	1.78571	6	355	1.69014	8	361	2.21607	8	459	1.74292	9	389	2.31362	14	392	3.57143	7	360
Christensenellales	0.387532	0.69286	0.177816	1.26066	0.519669	1.29336	0.578994	1.93178	0.879825	1.24094	0.411046	3	329	0.911854	5	282	1.77305	5	233	2.14592	3	271	1.10701	3	322	0.931677	2	288	0.694444	5	280	1.78571	1	355	0.28169	5	361	1.38504	8	459	1.74292	7	389	1.79949	3	392	0.765306	2	360
Clostridia_unclassified	0.590588	0.683229	0.0876857	1.19482	0.625937	1.35253	0.383919	1.03307	0.22102	1.04984	0.322277	8	329	2.43161	3	282	1.06383	3	233	1.28755	3	271	1.10701	3	322	0.931677	1	288	0.347222	2	280	0.714286	6	355	1.69014	6	361	1.66205	8	459	1.74292	5	389	1.28535	4	392	1.02041	3	360
RF39	0.0259408	0.510169	0.33388	0.808089	0.520521	0.387903	0.346451	0.448189	0.564058	1.23556	0.451759	0	329	0	2	282	0.70922	4	233	1.71674	3	271	1.10701	2	322	0.621118	2	288	0.694444	1	280	0.357143	0	355	0	0	361	0	2	459	0.43573	2	389	0.514139	4	392	1.02041	0	360
Clostridiales	0.0501534	0.328783	0.369483	0.577841	0.26074	0.312726	0.177768	0.164433	0.167	0.280343	0.169532	2	329	0.607903	1	282	0.35461	1	233	0.429185	3	271	1.10701	2	322	0.621118	1	288	0.347222	1	280	0.357143	0	355	0	1	361	0.277008	1	459	0.217865	2	389	0.514139	2	392	0.510204	1	360
Actinomycetales	0.029414	0.433857	0.390136	0.575442	0.141974	0.327631	0.215322	0.541391	0.240621	0.181282	0.19405	2	329	0.607903	2	282	0.70922	1	233	0.429185	2	271	0.738007	2	322	0.621118	1	288	0.347222	2	280	0.714286	1	355	0.28169	1	361	0.277008	2	459	0.43573	1	389	0.257069	0	392	0	2	360
Peptococcales	0.305529	0.643793	0.222091	0.574211	0.137767	0.570976	0.232636	0.885008	0.378434	0.671394	0.10814	2	329	0.607903	1	282	0.35461	1	233	0.429185	2	271	0.738007	2	322	0.621118	2	288	0.694444	2	280	0.714286	1	355	0.28169	1	361	0.277008	4	459	0.87146	3	389	0.771208	2	392	0.510204	1	360
Micrococcales	0.0409331	0.301881	0.300916	0.536112	0.211842	0.274313	0.0423778	0.436209	0.1548	0.445073	0.109479	2	329	0.607903	1	282	0.35461	2	233	0.858369	2	271	0.738007	1	322	0.310559	1	288	0.347222	1	280	0.357143	1	355	0.28169	1	361	0.277008	1	459	0.217865	1	389	0.257069	1	392	0.255102	1	360
Burkholderiales	0.799639	0.842477	0.0397356	0.450854	0.328384	0.502458	0.131694	0.485261	0.230204	0.58375	0.22822	1	329	0.303951	3	282	1.06383	0	233	0	1	271	0.369004	2	322	0.621118	1	288	0.347222	2	280	0.714286	2	355	0.56338	1	361	0.277008	2	459	0.43573	2	389	0.514139	2	392	0.510204	1	360
Veillonellales-Selenomonadales	0.657428	0.731853	0.15058	0.384411	0.275758	0.473902	0.245769	0.212802	0.222747	0.357235	0.112078	1	329	0.303951	1	282	0.35461	0	233	0	1	271	0.369004	3	322	0.931677	1	288	0.347222	2	280	0.714286	3	355	0.84507	2	361	0.554017	1	459	0.217865	1	389	0.257069	1	392	0.255102	2	360
Rhodobacterales	0.353928	0.673605	0.158059	0.379405	0.320748	0.231796	0.11166	0.101667	0.144636	0.221832	0.265419	0	329	0	1	282	0.35461	2	233	0.858369	1	271	0.369004	0	322	0	2	288	0.694444	1	280	0.357143	1	355	0.28169	1	361	0.277008	1	459	0.217865	1	389	0.257069	0	392	0	1	360
Firmicutes_unclassified	0.656965	0.745403	0.0657159	0.354009	0.308604	0.289966	0.263473	0.281345	0.229353	0.169144	0.185604	2	329	0.607903	0	282	0	2	233	0.858369	0	271	0	1	322	0.310559	1	288	0.347222	0	280	0	1	355	0.28169	0	361	0	2	459	0.43573	1	389	0.257069	3	392	0.765306	0	360
Staphylococcales	0.0605761	0.357399	0.315394	0.348922	0.272893	0.458833	0.157891	0.601007	0.136156	0.236483	0.199667	2	329	0.607903	2	282	0.70922	1	233	0.429185	0	271	0	0	322	0	1	288	0.347222	2	280	0.714286	1	355	0.28169	2	361	0.554017	2	459	0.43573	1	389	0.257069	2	392	0.510204	2	360
Campylobacterales	0.356243	0.656824	0.144875	0.338761	0.201843	0.240392	0.280252	0.537977	0.30092	0.323583	0.268447	1	329	0.303951	1	282	0.35461	0	233	0	1	271	0.369004	1	322	0.310559	2	288	0.694444	2	280	0.714286	0	355	0	0	361	0	1	459	0.217865	0	389	0	2	392	0.510204	2	360
Acidaminococcales	0.0324446	0.319039	0.366763	0.280891	0.127743	0.0791557	0.112514	0.39321	0.257228	0.100767	0.14684	1	329	0.303951	1	282	0.35461	0	233	0	1	271	0.369004	1	322	0.310559	1	288	0.347222	0	280	0	0	355	0	0	361	0	1	459	0.217865	1	389	0.257069	0	392	0	1	360
Oceanospirillales	0.127649	0.327448	0.230474	0.230232	0.163748	0.18452	0.136956	0.226339	0.161453	0.0401606	0.0898019	0	329	0	1	282	0.35461	0	233	0	1	271	0.369004	1	322	0.310559	1	288	0.347222	1	280	0.357143	0	355	0	1	361	0.277008	1	459	0.217865	0	389	0	1	392	0.255102	0	360
Pasteurellales	0.731166	0.784342	0.0174769	0.223021	0.15933	0.231796	0.11166	0.215923	0.155656	0.181872	0.135547	1	329	0.303951	1	282	0.35461	0	233	0	1	271	0.369004	1	322	0.310559	0	288	0	1	280	0.357143	1	355	0.28169	1	361	0.277008	1	459	0.217865	1	389	0.257069	0	392	0	1	360
Monoglobales	0.117231	0.314393	0.286268	0.188503	0.190312	0.559395	0.321489	0.14967	0.220423	0.380649	0.281677	0	329	0	1	282	0.35461	1	233	0.429185	0	271	0	0	322	0	1	288	0.347222	1	280	0.357143	0	355	0	2	361	0.554017	3	459	0.653595	3	389	0.771208	4	392	1.02041	2	360
Pseudomonadales	0.0841856	0.33113	0.293283	0.172362	0.173256	0.0595238	0.133099	0	0	0	0	0	329	0	1	282	0.35461	0	233	0	1	271	0.369004	1	322	0.310559	0	288	0	1	280	0.357143	0	355	0	0	361	0	0	459	0	0	389	0	0	392	0	0	360
Corynebacteriales	0.452846	0.607225	0.117957	0.16502	0.244459	0	0	0.112083	0.15855	0.101356	0.147407	0	329	0	0	282	0	0	233	0	1	271	0.369004	2	322	0.621118	0	288	0	0	280	0	0	355	0	0	361	0	0	459	0	0	389	0	0	392	0	0	360
Alteromonadales	0.249773	0.589464	0.220535	0.123291	0.17769	0.0469484	0.10498	0.152427	0.153174	0.266481	0.147885	0	329	0	0	282	0	1	233	0.429185	0	271	0	1	322	0.310559	0	288	0	0	280	0	1	355	0.28169	0	361	0	0	459	0	0	389	0	0	392	0	1	360
Acetobacterales	0.0995856	0.326419	0.272694	0.116972	0.165437	0	0	0	0	0	0	0	329	0	1	282	0.35461	0	233	0	0	271	0	0	322	0	1	288	0.347222	0	280	0	0	355	0	0	361	0	0	459	0	0	389	0	0	392	0	0	360
Eubacteriales	0.810188	0.838616	0.0122304	0.116972	0.165437	0.0791557	0.112514	0.110011	0.245992	0.131504	0.132114	0	329	0	1	282	0.35461	0	233	0	0	271	0	0	322	0	1	288	0.347222	0	280	0	0	355	0	0	361	0	1	459	0.217865	1	389	0.257069	0	392	0	0	360
Enterobacterales	0.420952	0.577585	0.125617	0.11326	0.161061	0.105692	0.15125	0.0462963	0.103522	0	0	0	329	0	0	282	0	0	233	0	1	271	0.369004	1	322	0.310559	0	288	0	1	280	0.357143	0	355	0	1	361	0.277008	0	459	0	0	389	0	0	392	0	1	360
Actinobacteria_unclassified	0.0995856	0.30924	0.270978	0.10976	0.155912	0	0	0	0	0	0	1	329	0.303951	1	282	0.35461	0	233	0	0	271	0	0	322	0	0	288	0	0	280	0	0	355	0	0	361	0	0	459	0	0	389	0	0	392	0	0	360
Verrucomicrobiales	0.553086	0.665961	0.0951177	0.101317	0.226552	0	0	0.0631313	0.141166	0	0	2	329	0.607903	0	282	0	0	233	0	0	271	0	0	322	0	0	288	0	0	280	0	0	355	0	0	361	0	0	459	0	0	389	0	0	392	0	0	360
Bifidobacteriales	0.0980919	0.340437	0.283938	0.0578704	0.129402	0	0	0.158379	0.159615	0	0	0	329	0	0	282	0	0	233	0	0	271	0	0	322	0	1	288	0.347222	0	280	0	0	355	0	0	361	0	0	459	0	0	389	0	0	392	0	1	360
Fibrobacterales	0.391625	0.60805	0.130435	0.0578704	0.129402	0	0	0	0	0	0	0	329	0	0	282	0	0	233	0	0	271	0	0	322	0	1	288	0.347222	0	280	0	0	355	0	0	361	0	0	459	0	0	389	0	0	392	0	0	360
Sphingomonadales	0.0841856	0.310435	0.276416	0.0517598	0.115739	0	0	0	0	0.141711	0.147279	0	329	0	0	282	0	0	233	0	0	271	0	1	322	0.310559	0	288	0	0	280	0	0	355	0	0	361	0	0	459	0	0	389	0	0	392	0	0	360
Saccharimonadales	0.334945	0.681439	0.178873	0.0517598	0.115739	0.121673	0.122339	0.055371	0.123813	0.205286	0.166863	0	329	0	0	282	0	0	233	0	0	271	0	1	322	0.310559	0	288	0	0	280	0	0	355	0	0	361	0	1	459	0.217865	1	389	0.257069	1	392	0.255102	0	360
Fusobacteriales	0.300413	0.681706	0.167183	0.0517598	0.115739	0.125324	0.126522	0.0462963	0.103522	0	0	0	329	0	0	282	0	0	233	0	0	271	0	1	322	0.310559	0	288	0	0	280	0	0	355	0	1	361	0.277008	1	459	0.217865	1	389	0.257069	0	392	0	1	360
Cardiobacteriales	0.553086	0.652642	0.0930935	0.0506586	0.113276	0.0363108	0.0811935	0	0	0	0	1	329	0.303951	0	282	0	0	233	0	0	271	0	0	322	0	0	288	0	0	280	0	0	355	0	0	361	0	1	459	0.217865	0	389	0	0	392	0	0	360
Caulobacterales	0.391625	0.660168	0.130435	0.0506586	0.113276	0	0	0	0	0	0	1	329	0.303951	0	282	0	0	233	0	0	271	0	0	322	0	0	288	0	0	280	0	0	355	0	0	361	0	0	459	0	0	389	0	0	392	0	0	360
AD3_or	0.000473479	0.0279353	0.763429	0	0	0.231468	0.111588	0	0	0	0	0	329	0	0	282	0	0	233	0	0	271	0	0	322	0	0	288	0	1	280	0.357143	1	355	0.28169	1	361	0.277008	1	459	0.217865	0	389	0	1	392	0.255102	0	360
Spirochaetales	0.00909551	0.268318	0.404417	0	0	0.0428449	0.0958041	0.264875	0.120333	0.327335	0.302789	0	329	0	0	282	0	0	233	0	0	271	0	0	322	0	0	288	0	0	280	0	0	355	0	0	361	0	0	459	0	1	389	0.257069	0	392	0	1	360
Vibrionales	0.0995856	0.279788	0.272659	0	0	0	0	0.112449	0.159054	0	0	0	329	0	0	282	0	0	233	0	0	271	0	0	322	0	0	288	0	0	280	0	0	355	0	0	361	0	0	459	0	0	389	0	0	392	0	0	360
Clostridia_vadinBB60_group	0.0995856	0.293778	0.271998	0	0	0	0	0.097421	0.138028	0	0	0	329	0	0	282	0	0	233	0	0	271	0	0	322	0	0	288	0	0	280	0	0	355	0	0	361	0	0	459	0	0	389	0	0	392	0	1	360
Aeromonadales	0.0384606	0.324168	0.346743	0	0	0	0	0.120209	0.170324	0.184981	0.137153	0	329	0	0	282	0	0	233	0	0	271	0	0	322	0	0	288	0	0	280	0	0	355	0	0	361	0	0	459	0	0	389	0	0	392	0	0	360
Chitinophagales	0.0841856	0.354782	0.286063	0	0	0.129427	0.131047	0.0462963	0.103522	0	0	0	329	0	0	282	0	0	233	0	0	271	0	0	322	0	0	288	0	0	280	0	1	355	0.28169	1	361	0.277008	1	459	0.217865	0	389	0	0	392	0	1	360
Clostridia_or	0.39563	0.555766	0.132226	0	0	0.134853	0.209324	0.112449	0.159054	0.0403551	0.0902368	0	329	0	0	282	0	0	233	0	0	271	0	0	322	0	0	288	0	0	280	0	0	355	0	2	361	0.554017	0	459	0	0	389	0	1	392	0.255102	0	360
Bacteria_unclassified	0.228638	0.562068	0.170116	0	0	0.0595238	0.133099	0.267631	0.286554	0.283275	0.45154	0	329	0	0	282	0	0	233	0	0	271	0	0	322	0	0	288	0	1	280	0.357143	0	355	0	0	361	0	0	459	0	0	389	0	0	392	0	0	360
Chlamydiales	0.391625	0.563558	0.130435	0	0	0	0	0	0	0.0403551	0.0902368	0	329	0	0	282	0	0	233	0	0	271	0	0	322	0	0	288	0	0	280	0	0	355	0	0	361	0	0	459	0	0	389	0	0	392	0	0	360
RBG-13-54-9	0.391625	0.577647	0.130435	0	0	0	0	0.0550055	0.122996	0	0	0	329	0	0	282	0	0	233	0	0	271	0	0	322	0	0	288	0	0	280	0	0	355	0	0	361	0	0	459	0	0	389	0	0	392	0	0	360
Deferribacterales	0.391625	0.592459	0.130435	0	0	0	0	0.055371	0.123813	0	0	0	329	0	0	282	0	0	233	0	0	271	0	0	322	0	0	288	0	0	280	0	0	355	0	0	361	0	0	459	0	0	389	0	0	392	0	0	360
MB-A2-108_or	0.391625	0.624483	0.130435	0	0	0	0	0.0550055	0.122996	0	0	0	329	0	0	282	0	0	233	0	0	271	0	0	322	0	0	288	0	0	280	0	0	355	0	0	361	0	0	459	0	0	389	0	0	392	0	0	360
Bacteroidia_unclassified	0.391625	0.64183	0.130435	0	0	0	0	0.102249	0.228637	0	0	0	329	0	0	282	0	0	233	0	0	271	0	0	322	0	0	288	0	0	280	0	0	355	0	0	361	0	0	459	0	0	389	0	0	392	0	0	360
Chthoniobacterales	0.391625	0.679585	0.130435	0	0	0.042517	0.0950709	0	0	0	0	0	329	0	0	282	0	0	233	0	0	271	0	0	322	0	0	288	0	0	280	0	0	355	0	0	361	0	0	459	0	0	389	0	1	392	0.255102	0	360
Gemmatimonadales	0.553086	0.679835	0.0922405	0	0	0.042517	0.0950709	0.0550055	0.122996	0	0	0	329	0	0	282	0	0	233	0	0	271	0	0	322	0	0	288	0	0	280	0	0	355	0	0	361	0	0	459	0	0	389	0	1	392	0.255102	0	360
WPS-2_or	0.553086	0.6943	0.0923078	0	0	0.042517	0.0950709	0.055371	0.123813	0	0	0	329	0	0	282	0	0	233	0	0	271	0	0	322	0	0	288	0	0	280	0	0	355	0	0	361	0	0	459	0	0	389	0	1	392	0.255102	0	360
Cellvibrionales	0.553086	0.709393	0.0911025	0	0	0	0	0.0550055	0.122996	0.0606061	0.135519	0	329	0	0	282	0	0	233	0	0	271	0	0	322	0	0	288	0	0	280	0	0	355	0	0	361	0	0	459	0	0	389	0	0	392	0	0	360
Alphaproteobacteria_unclassified	0.553086	0.725158	0.0934988	0	0	0	0	0.0631313	0.141166	0.0438596	0.0980732	0	329	0	0	282	0	0	233	0	0	271	0	0	322	0	0	288	0	0	280	0	0	355	0	0	361	0	0	459	0	0	389	0	0	392	0	0	360
[truncated: 34 more columns]

## Sheet: Family
taxon	p-values	p-values (corrected)	Effect size	HF: mean rel, freq, (%)	HF: std, dev, (%)	HFC: mean rel, freq, (%)	HFC: std, dev, (%)	ST: mean rel, freq, (%)	ST: std, dev, (%)	STC: mean rel, freq, (%)	STC: std, dev, (%)	HS116	HS116: parent seq, count	HS116: rel, freq, (%)	HS117	HS117: parent seq, count	HS117: rel, freq, (%)	HS118	HS118: parent seq, count	HS118: rel, freq, (%)	HS119	HS119: parent seq, count	HS119: rel, freq, (%)	HS120	HS120: parent seq, count	HS120: rel, freq, (%)	HS121	HS121: parent seq, count	HS121: rel, freq, (%)	HS122	HS122: parent seq, count	HS122: rel, freq, (%)	HS123	HS123: parent seq, count	HS123: rel, freq, (%)	HS124	HS124: parent seq, count	HS124: rel, freq, (%)	HS125	HS125: parent seq, count	HS125: rel, freq, (%)	HS126	HS126: parent seq, count	HS126: rel, freq, (%)	HS127	HS127: parent seq, count	HS127: rel, freq, (%)	HS092	HS092: parent seq, count
Lachnospiraceae	0.0539073	0.287506	0.359523	35.3903	2.59494	37.227	2.83702	30.6773	4.039	34.9837	3.15882	130	329	39.5137	93	282	32.9787	87	233	37.3391	99	271	36.5314	104	322	32.2981	97	288	33.6806	94	280	33.5714	134	355	37.7465	153	361	42.3823	173	459	37.6906	146	389	37.5321	135	392	34.4388	131	360
Oscillospiraceae	0.0111629	0.153091	0.459286	12.6631	1.04432	13.4427	1.3307	15.3098	1.14521	14.0334	0.47808	43	329	13.0699	38	282	13.4752	25	233	10.7296	32	271	11.8081	43	322	13.354	39	288	13.5417	35	280	12.5	53	355	14.9296	40	361	11.0803	63	459	13.7255	53	389	13.6247	58	392	14.7959	58	360
Ruminococcaceae	0.24133	0.681403	0.134891	8.4259	1.42081	8.7303	1.75683	9.73868	1.01415	9.13043	0.232764	21	329	6.38298	23	282	8.15603	19	233	8.15451	30	271	11.0701	25	322	7.76398	26	288	9.02778	17	280	6.07143	32	355	9.01408	24	361	6.6482	49	459	10.6754	38	389	9.76864	40	392	10.2041	37	360
Muribaculaceae	0.789962	0.833366	0.0407157	7.08596	1.26981	6.69089	1.10762	6.4993	1.44969	7.05915	0.933323	21	329	6.38298	15	282	5.31915	19	233	8.15451	16	271	5.90406	26	322	8.07453	25	288	8.68056	19	280	6.78571	24	355	6.76056	32	361	8.86427	25	459	5.44662	22	389	5.65553	26	392	6.63265	22	360
Erysipelotrichaceae	0.172286	0.533531	0.242058	3.86392	1.28511	3.26747	0.483872	3.31286	1.01659	2.40615	0.697557	5	329	1.51976	13	282	4.60993	7	233	3.00429	15	271	5.53506	14	322	4.34783	12	288	4.16667	10	280	3.57143	11	355	3.09859	14	361	3.87812	11	459	2.39651	14	389	3.59897	12	392	3.06122	11	360
Desulfovibrionaceae	0.302232	0.763534	0.170658	2.79491	1.04154	2.83251	0.921879	3.75294	0.906876	2.69587	0.883809	13	329	3.95137	11	282	3.90071	3	233	1.28755	8	271	2.95203	5	322	1.5528	9	288	3.125	12	280	4.28571	13	355	3.66197	8	361	2.21607	9	459	1.96078	12	389	3.08483	7	392	1.78571	12	360
Anaerovoracaceae	0.68227	0.779738	0.120078	2.7037	0.516687	2.60665	0.59654	3.13901	0.725939	2.8805	0.225625	9	329	2.73556	6	282	2.12766	8	233	3.43348	9	271	3.32103	7	322	2.17391	7	288	2.43056	9	280	3.21429	9	355	2.53521	5	361	1.38504	12	459	2.61438	12	389	3.08483	11	392	2.80612	9	360
Bacteroidaceae	0.447068	0.692234	0.134577	2.32768	0.315472	2.33909	0.823622	1.90547	0.664062	1.78866	0.58849	6	329	1.82371	6	282	2.12766	6	233	2.57511	6	271	2.21402	9	322	2.79503	7	288	2.43056	11	280	3.92857	10	355	2.8169	8	361	2.21607	8	459	1.74292	7	389	1.79949	6	392	1.53061	6	360
Prevotellaceae	0.485007	0.72751	0.08396	2.04629	0.93217	1.57672	0.699134	2.56155	1.52093	2.38929	1.58203	6	329	1.82371	9	282	3.19149	1	233	0.429185	5	271	1.84502	6	322	1.86335	9	288	3.125	3	280	1.07143	11	355	3.09859	5	361	1.38504	5	459	1.08932	5	389	1.28535	6	392	1.53061	5	360
Clostridia_UCG-014_fa	0.67307	0.77849	0.0892667	1.82934	0.995013	2.21998	0.649628	2.19433	0.929059	2.68009	1.20138	5	329	1.51976	6	282	2.12766	8	233	3.43348	1	271	0.369004	8	322	2.48447	3	288	1.04167	5	280	1.78571	6	355	1.69014	8	361	2.21607	8	459	1.74292	9	389	2.31362	14	392	3.57143	7	360
Eggerthellaceae	0.00894865	0.171814	0.47468	1.66298	0.500038	2.35748	0.49063	1.41238	0.292704	2.35776	0.449824	9	329	2.73556	4	282	1.41844	4	233	1.71674	4	271	1.47601	4	322	1.24224	4	288	1.38889	5	280	1.78571	10	355	2.8169	9	361	2.49307	10	459	2.17865	12	389	3.08483	7	392	1.78571	6	360
Oscillospirales_fa	0.0801896	0.38491	0.324533	1.341	0.710146	0.974923	0.399059	0.489142	0.24813	0.863309	0.207508	3	329	0.911854	2	282	0.70922	5	233	2.14592	1	271	0.369004	7	322	2.17391	5	288	1.73611	4	280	1.42857	4	355	1.12676	4	361	1.10803	3	459	0.653595	1	389	0.257069	5	392	1.27551	1	360
Christensenellaceae	0.387532	0.791555	0.177816	1.26066	0.519669	1.29336	0.578994	1.93178	0.879825	1.24094	0.411046	3	329	0.911854	5	282	1.77305	5	233	2.14592	3	271	1.10701	3	322	0.931677	2	288	0.694444	5	280	1.78571	1	355	0.28169	5	361	1.38504	8	459	1.74292	7	389	1.79949	3	392	0.765306	2	360
Clostridia_unclassified	0.590588	0.726878	0.0876857	1.19482	0.625937	1.35253	0.383919	1.03307	0.22102	1.04984	0.322277	8	329	2.43161	3	282	1.06383	3	233	1.28755	3	271	1.10701	3	322	0.931677	1	288	0.347222	2	280	0.714286	6	355	1.69014	6	361	1.66205	8	459	1.74292	5	389	1.28535	4	392	1.02041	3	360
Streptococcaceae	0.0888771	0.355508	0.238047	1.03886	0.427671	0.661139	0.364256	1.10567	0.491541	0.617722	0.229401	4	329	1.21581	5	282	1.77305	2	233	0.858369	3	271	1.10701	3	322	0.931677	1	288	0.347222	4	280	1.42857	2	355	0.56338	2	361	0.554017	3	459	0.653595	1	389	0.257069	2	392	0.510204	3	360
Erysipelatoclostridiaceae	0.192942	0.578825	0.190901	0.834245	0.248348	0.472516	0.283927	0.806998	0.306608	0.592785	0.383925	2	329	0.607903	2	282	0.70922	3	233	1.28755	2	271	0.738007	2	322	0.621118	3	288	1.04167	3	280	1.07143	1	355	0.28169	1	361	0.277008	2	459	0.43573	2	389	0.514139	1	392	0.255102	3	360
RF39_fa	0.0259408	0.249031	0.33388	0.808089	0.520521	0.387903	0.346451	0.448189	0.564058	1.23556	0.451759	0	329	0	2	282	0.70922	4	233	1.71674	3	271	1.10701	2	322	0.621118	2	288	0.694444	1	280	0.357143	0	355	0	0	361	0	2	459	0.43573	2	389	0.514139	4	392	1.02041	0	360
Lactobacillaceae	0.815766	0.851234	0.0280895	0.770264	0.289751	0.661827	0.242627	0.642693	0.359617	0.705755	0.246161	2	329	0.607903	2	282	0.70922	3	233	1.28755	2	271	0.738007	3	322	0.931677	1	288	0.347222	1	280	0.357143	4	355	1.12676	2	361	0.554017	3	459	0.653595	2	389	0.514139	3	392	0.765306	3	360
Butyricicoccaceae	0.969726	0.969726	0.00460544	0.736963	0.265195	0.676668	0.258676	0.713674	0.360746	0.714245	0.369539	3	329	0.911854	3	282	1.06383	1	233	0.429185	2	271	0.738007	3	322	0.931677	1	288	0.347222	3	280	1.07143	1	355	0.28169	2	361	0.554017	4	459	0.87146	3	389	0.771208	2	392	0.510204	1	360
Coriobacteriaceae	0.0149781	0.159766	0.436426	0.724889	0.288394	0.359962	0.288563	0.399847	0.249029	0.104466	0.150557	4	329	1.21581	2	282	0.70922	1	233	0.429185	1	271	0.369004	3	322	0.931677	2	288	0.694444	2	280	0.714286	1	355	0.28169	0	361	0	3	459	0.653595	0	389	0	2	392	0.510204	0	360
Peptostreptococcaceae	0.764217	0.843274	0.0366728	0.583886	0.262612	0.597512	0.239427	0.658945	0.285717	0.519839	0.220699	1	329	0.303951	3	282	1.06383	1	233	0.429185	2	271	0.738007	2	322	0.621118	1	288	0.347222	3	280	1.07143	1	355	0.28169	2	361	0.554017	3	459	0.653595	2	389	0.514139	2	392	0.510204	3	360
Clostridiaceae	0.0501534	0.30092	0.369483	0.577841	0.26074	0.312726	0.177768	0.164433	0.167	0.280343	0.169532	2	329	0.607903	1	282	0.35461	1	233	0.429185	3	271	1.10701	2	322	0.621118	1	288	0.347222	1	280	0.357143	0	355	0	1	361	0.277008	1	459	0.217865	2	389	0.514139	2	392	0.510204	1	360
Actinomycetaceae	0.029414	0.256704	0.390136	0.575442	0.141974	0.327631	0.215322	0.541391	0.240621	0.181282	0.19405	2	329	0.607903	2	282	0.70922	1	233	0.429185	2	271	0.738007	2	322	0.621118	1	288	0.347222	2	280	0.714286	1	355	0.28169	1	361	0.277008	2	459	0.43573	1	389	0.257069	0	392	0	2	360
Peptococcaceae	0.305529	0.752071	0.222091	0.574211	0.137767	0.570976	0.232636	0.885008	0.378434	0.671394	0.10814	2	329	0.607903	1	282	0.35461	1	233	0.429185	2	271	0.738007	2	322	0.621118	2	288	0.694444	2	280	0.714286	1	355	0.28169	1	361	0.277008	4	459	0.87146	3	389	0.771208	2	392	0.510204	1	360
Micrococcaceae	0.0409331	0.261972	0.300916	0.536112	0.211842	0.274313	0.0423778	0.436209	0.1548	0.445073	0.109479	2	329	0.607903	1	282	0.35461	2	233	0.858369	2	271	0.738007	1	322	0.310559	1	288	0.347222	1	280	0.357143	1	355	0.28169	1	361	0.277008	1	459	0.217865	1	389	0.257069	1	392	0.255102	1	360
Tannerellaceae	0.292644	0.780384	0.150672	0.480722	0.278073	0.370148	0.165959	0.218944	0.24673	0.29293	0.21469	2	329	0.607903	1	282	0.35461	2	233	0.858369	1	271	0.369004	0	322	0	2	288	0.694444	2	280	0.714286	1	355	0.28169	1	361	0.277008	2	459	0.43573	1	389	0.257069	1	392	0.255102	0	360
Oscillospirales_unclassified	0.621541	0.736641	0.0825915	0.447143	0.367069	0.609667	0.258231	0.683768	0.287383	0.712122	0.43178	1	329	0.303951	2	282	0.70922	0	233	0	2	271	0.738007	3	322	0.931677	0	288	0	1	280	0.357143	1	355	0.28169	3	361	0.831025	3	459	0.653595	2	389	0.514139	4	392	1.02041	4	360
Marinifilaceae	0.906598	0.925887	0.0345964	0.390521	0.22631	0.50213	0.197132	0.446509	0.190025	0.451463	0.219433	1	329	0.303951	1	282	0.35461	0	233	0	1	271	0.369004	2	322	0.621118	2	288	0.694444	2	280	0.714286	2	355	0.56338	1	361	0.277008	2	459	0.43573	1	389	0.257069	3	392	0.765306	1	360
Rhodobacteraceae	0.353928	0.790165	0.158059	0.379405	0.320748	0.231796	0.11166	0.101667	0.144636	0.221832	0.265419	0	329	0	1	282	0.35461	2	233	0.858369	1	271	0.369004	0	322	0	2	288	0.694444	1	280	0.357143	1	355	0.28169	1	361	0.277008	1	459	0.217865	1	389	0.257069	0	392	0	1	360
Firmicutes_unclassified	0.656965	0.76913	0.0657159	0.354009	0.308604	0.289966	0.263473	0.281345	0.229353	0.169144	0.185604	2	329	0.607903	0	282	0	2	233	0.858369	0	271	0	1	322	0.310559	1	288	0.347222	0	280	0	1	355	0.28169	0	361	0	2	459	0.43573	1	389	0.257069	3	392	0.765306	0	360
Helicobacteraceae	0.356243	0.759986	0.144875	0.338761	0.201843	0.240392	0.280252	0.537977	0.30092	0.323583	0.268447	1	329	0.303951	1	282	0.35461	0	233	0	1	271	0.369004	1	322	0.310559	2	288	0.694444	2	280	0.714286	0	355	0	0	361	0	1	459	0.217865	0	389	0	2	392	0.510204	2	360
Veillonellaceae	0.597878	0.726536	0.0786249	0.332651	0.181066	0.199589	0.217052	0.212802	0.222747	0.273215	0.0432911	1	329	0.303951	1	282	0.35461	0	233	0	1	271	0.369004	2	322	0.621118	1	288	0.347222	1	280	0.357143	2	355	0.56338	1	361	0.277008	0	459	0	0	389	0	0	392	0	2	360
Rikenellaceae	0.394837	0.664989	0.103945	0.298133	0.243361	0.227365	0.110109	0.528625	0.599867	0.485548	0.336223	0	329	0	1	282	0.35461	1	233	0.429185	0	271	0	1	322	0.310559	2	288	0.694444	1	280	0.357143	0	355	0	1	361	0.277008	1	459	0.217865	1	389	0.257069	1	392	0.255102	1	360
UCG-010	0.617307	0.740769	0.104938	0.290921	0.136341	0.274313	0.0423778	0.316	0.178411	0.41532	0.223274	1	329	0.303951	1	282	0.35461	1	233	0.429185	0	271	0	1	322	0.310559	1	288	0.347222	1	280	0.357143	1	355	0.28169	1	361	0.277008	1	459	0.217865	1	389	0.257069	1	392	0.255102	1	360
Acidaminococcaceae	0.0324446	0.259557	0.366763	0.280891	0.127743	0.0791557	0.112514	0.39321	0.257228	0.100767	0.14684	1	329	0.303951	1	282	0.35461	0	233	0	1	271	0.369004	1	322	0.310559	1	288	0.347222	0	280	0	0	355	0	0	361	0	1	459	0.217865	1	389	0.257069	0	392	0	1	360
Sutterellaceae	0.283117	0.77655	0.039868	0.280891	0.127743	0.274313	0.0423778	0.270929	0.124911	0.225731	0.109717	1	329	0.303951	1	282	0.35461	0	233	0	1	271	0.369004	1	322	0.310559	1	288	0.347222	1	280	0.357143	1	355	0.28169	1	361	0.277008	1	459	0.217865	1	389	0.257069	1	392	0.255102	1	360
Gemellaceae	0.35559	0.775833	0.0849183	0.239161	0.173065	0.227365	0.110109	0.221876	0.159647	0.128394	0.129165	1	329	0.303951	1	282	0.35461	1	233	0.429185	0	271	0	0	322	0	1	288	0.347222	1	280	0.357143	0	355	0	1	361	0.277008	1	459	0.217865	1	389	0.257069	1	392	0.255102	1	360
Nitrincolaceae	0.0383099	0.282904	0.359075	0.230232	0.163748	0.18452	0.136956	0.0570776	0.127629	0	0	0	329	0	1	282	0.35461	0	233	0	1	271	0.369004	1	322	0.310559	1	288	0.347222	1	280	0.357143	0	355	0	1	361	0.277008	1	459	0.217865	0	389	0	1	392	0.255102	0	360
Pasteurellaceae	0.731166	0.825787	0.0174769	0.223021	0.15933	0.231796	0.11166	0.215923	0.155656	0.181872	0.135547	1	329	0.303951	1	282	0.35461	0	233	0	1	271	0.369004	1	322	0.310559	0	288	0	1	280	0.357143	1	355	0.28169	1	361	0.277008	1	459	0.217865	1	389	0.257069	0	392	0	1	360
Monoglobaceae	0.117231	0.37514	0.286268	0.188503	0.190312	0.559395	0.321489	0.14967	0.220423	0.380649	0.281677	0	329	0	1	282	0.35461	1	233	0.429185	0	271	0	0	322	0	1	288	0.347222	1	280	0.357143	0	355	0	2	361	0.554017	3	459	0.653595	3	389	0.771208	4	392	1.02041	2	360
Carnobacteriaceae	0.347269	0.813118	0.138968	0.182392	0.185649	0.184848	0.137127	0.175214	0.175824	0.0401606	0.0898019	0	329	0	1	282	0.35461	1	233	0.429185	0	271	0	1	322	0.310559	0	288	0	1	280	0.357143	0	355	0	1	361	0.277008	1	459	0.217865	1	389	0.257069	0	392	0	0	360
Moraxellaceae	0.0841856	0.384849	0.293283	0.172362	0.173256	0.0595238	0.133099	0	0	0	0	0	329	0	1	282	0.35461	0	233	0	1	271	0.369004	1	322	0.310559	0	288	0	1	280	0.357143	0	355	0	0	361	0	0	459	0	0	389	0	0	392	0	0	360
Bacteroidales_RF16_group	0.348312	0.796143	0.153359	0.171131	0.171978	0.138352	0.14448	0.270929	0.124911	0.101356	0.147407	0	329	0	0	282	0	0	233	0	1	271	0.369004	1	322	0.310559	1	288	0.347222	1	280	0.357143	0	355	0	0	361	0	1	459	0.217865	0	389	0	1	392	0.255102	1	360
Aerococcaceae	0.447854	0.682444	0.111339	0.16152	0.162301	0.0791557	0.112514	0.0550055	0.122996	0.0474834	0.106176	1	329	0.303951	1	282	0.35461	0	233	0	0	271	0	1	322	0.310559	0	288	0	0	280	0	0	355	0	0	361	0	1	459	0.217865	1	389	0.257069	0	392	0	0	360
Atopobiaceae	0.832138	0.858981	0.0661817	0.160289	0.160853	0.167841	0.119956	0.160552	0.163337	0.253358	0.14206	1	329	0.303951	0	282	0	0	233	0	0	271	0	1	322	0.310559	1	288	0.347222	0	280	0	0	355	0	1	361	0.277008	1	459	0.217865	1	389	0.257069	1	392	0.255102	1	360
Alteromonadaceae	0.439031	0.690935	0.12801	0.123291	0.17769	0.0469484	0.10498	0.0462963	0.103522	0	0	0	329	0	0	282	0	1	233	0.429185	0	271	0	1	322	0.310559	0	288	0	0	280	0	1	355	0.28169	0	361	0	0	459	0	0	389	0	0	392	0	1	360
Acetobacteraceae	0.0995856	0.341436	0.272694	0.116972	0.165437	0	0	0	0	0	0	0	329	0	1	282	0.35461	0	233	0	0	271	0	0	322	0	1	288	0.347222	0	280	0	0	355	0	0	361	0	0	459	0	0	389	0	0	392	0	0	360
Corynebacteriaceae	0.39563	0.654836	0.136033	0.11326	0.161061	0	0	0.112083	0.15855	0.0407498	0.0911193	0	329	0	0	282	0	0	233	0	1	271	0.369004	1	322	0.310559	0	288	0	0	280	0	0	355	0	0	361	0	0	459	0	0	389	0	0	392	0	0	360
Enterobacteriaceae	0.420952	0.673523	0.125617	0.11326	0.161061	0.105692	0.15125	0.0462963	0.103522	0	0	0	329	0	0	282	0	0	233	0	1	271	0.369004	1	322	0.310559	0	288	0	1	280	0.357143	0	355	0	1	361	0.277008	0	459	0	0	389	0	0	392	0	1	360
Alcaligenaceae	0.91861	0.928279	0.0400724	0.110861	0.157297	0.185628	0.137661	0.163208	0.163543	0.185571	0.137399	0	329	0	1	282	0.35461	0	233	0	0	271	0	1	322	0.310559	0	288	0	1	280	0.357143	1	355	0.28169	0	361	0	1	459	0.217865	1	389	0.257069	0	392	0	0	360
Staphylococcaceae	0.0509625	0.287789	0.405566	0.10976	0.155912	0.231468	0.111588	0.379131	0.1089	0.108089	0.154542	1	329	0.303951	1	282	0.35461	0	233	0	0	271	0	0	322	0	0	288	0	1	280	0.357143	1	355	0.28169	1	361	0.277008	1	459	0.217865	0	389	0	1	392	0.255102	1	360
Actinobacteria_unclassified	0.0995856	0.329663	0.270978	0.10976	0.155912	0	0	0	0	0	0	1	329	0.303951	1	282	0.35461	0	233	0	0	271	0	0	322	0	0	288	0	0	280	0	0	355	0	0	361	0	0	459	0	0	389	0	0	392	0	0	360
Bacteroidales_unclassified	0.362988	0.757539	0.16802	0.10963	0.155401	0.0788278	0.111996	0.334644	0.330738	0.20859	0.22676	0	329	0	0	282	0	0	233	0	0	271	0	1	322	0.310559	1	288	0.347222	0	280	0	0	355	0	0	361	0	1	459	0.217865	0	389	0	1	392	0.255102	0	360
Coriobacteriales_Incertae_Sedis	0.580035	0.72316	0.115809	0.102418	0.144854	0.124996	0.126182	0.0462963	0.103522	0.172253	0.122635	1	329	0.303951	0	282	0	0	233	0	0	271	0	1	322	0.310559	0	288	0	0	280	0	0	355	0	1	361	0.277008	1	459	0.217865	0	389	0	1	392	0.255102	1	360
uncultured	0.75617	0.844097	0.170972	0.102418	0.144854	0.214789	0.0982374	0.101302	0.144054	0.212609	0.0963296	1	329	0.303951	0	282	0	0	233	0	0	271	0	1	322	0.310559	0	288	0	0	280	0	1	355	0.28169	1	361	0.277008	1	459	0.217865	1	389	0.257069	1	392	0.255102	1	360
Akkermansiaceae	0.553086	0.717518	0.0951177	0.101317	0.226552	0	0	0.0631313	0.141166	0	0	2	329	0.607903	0	282	0	0	233	0	0	271	0	0	322	0	0	288	0	0	280	0	0	355	0	0	361	0	0	459	0	0	389	0	0	392	0	0	360
Ethanoligenenaceae	0.553086	0.747835	0.0941393	0.0715308	0.159948	0	0	0	0	0.0474834	0.106176	0	329	0	0	282	0	1	233	0.429185	0	271	0	0	322	0	0	288	0	0	280	0	0	355	0	0	361	0	0	459	0	0	389	0	0	392	0	0	360
Gallionellaceae	0.553086	0.737449	0.0918785	0.0591017	0.132155	0	0	0	0	0.0474834	0.106176	0	329	0	1	282	0.35461	0	233	0	0	271	0	0	322	0	0	288	0	0	280	0	0	355	0	0	361	0	0	459	0	0	389	0	0	392	0	0	360
Eubacteriaceae	0.774745	0.845177	0.0499419	0.0591017	0.132155	0.0428449	0.0958041	0.0550055	0.122996	0	0	0	329	0	1	282	0.35461	0	233	0	0	271	0	0	322	0	0	288	0	0	280	0	0	355	0	0	361	0	0	459	0	1	389	0.257069	0	392	0	0	360
Bifidobacteriaceae	0.0980919	0.376673	0.283938	0.0578704	0.129402	0	0	0.158379	0.159615	0	0	0	329	0	0	282	0	0	233	0	0	271	0	0	322	0	1	288	0.347222	0	280	0	0	355	0	0	361	0	0	459	0	0	389	0	0	392	0	1	360
Anaerofustaceae	0.537574	0.781926	0.0864173	0.0578704	0.129402	0.0363108	0.0811935	0.0550055	0.122996	0.131504	0.132114	0	329	0	0	282	0	0	233	0	0	271	0	0	322	0	1	288	0.347222	0	280	0	0	355	0	0	361	0	1	459	0.217865	0	389	0	0	392	0	0	360
Fibrobacteraceae	0.391625	0.78325	0.130435	0.0578704	0.129402	0	0	0	0	0	0	0	329	0	0	282	0	0	233	0	0	271	0	0	322	0	1	288	0.347222	0	280	0	0	355	0	0	361	0	0	459	0	0	389	0	0	392	0	0	360
Peptostreptococcales-Tissierellales_fa	0.774745	0.83568	0.0524433	0.0578704	0.129402	0.0363108	0.0811935	0.0550055	0.122996	0	0	0	329	0	0	282	0	0	233	0	0	271	0	0	322	0	1	288	0.347222	0	280	0	0	355	0	0	361	0	1	459	0.217865	0	389	0	0	392	0	0	360
Selenomonadaceae	0.00479585	0.153467	0.593998	0.0517598	0.115739	0.274313	0.0423778	0	0	0.0840203	0.118995	0	329	0	0	282	0	0	233	0	0	271	0	1	322	0.310559	0	288	0	1	280	0.357143	1	355	0.28169	1	361	0.277008	1	459	0.217865	1	389	0.257069	1	392	0.255102	0	360
Sphingomonadaceae	0.0841856	0.351384	0.276416	0.0517598	0.115739	0	0	0	0	0.141711	0.147279	0	329	0	0	282	0	0	233	0	0	271	0	1	322	0.310559	0	288	0	0	280	0	0	355	0	0	361	0	0	459	0	0	389	0	0	392	0	0	360
Fusobacteriaceae	0.300413	0.77945	0.167183	0.0517598	0.115739	0.125324	0.126522	0.0462963	0.103522	0	0	0	329	0	0	282	0	0	233	0	0	271	0	1	322	0.310559	0	288	0	0	280	0	0	355	0	1	361	0.277008	1	459	0.217865	1	389	0.257069	0	392	0	1	360
Nocardiaceae	0.553086	0.780828	0.0914179	0.0517598	0.115739	0	0	0	0	0.0606061	0.135519	0	329	0	0	282	0	0	233	0	0	271	0	1	322	0.310559	0	288	0	0	280	0	0	355	0	0	361	0	0	459	0	0	389	0	0	392	0	0	360
Saccharimonadaceae	0.334945	0.803867	0.178873	0.0517598	0.115739	0.121673	0.122339	0.055371	0.123813	0.205286	0.166863	0	329	0	0	282	0	0	233	0	0	271	0	1	322	0.310559	0	288	0	0	280	0	0	355	0	0	361	0	1	459	0.217865	1	389	0.257069	1	392	0.255102	0	360
Erysipelotrichales_unclassified	0.774745	0.826395	0.0490477	0.0517598	0.115739	0.0428449	0.0958041	0.0550055	0.122996	0	0	0	329	0	0	282	0	0	233	0	0	271	0	1	322	0.310559	0	288	0	0	280	0	0	355	0	0	361	0	0	459	0	1	389	0.257069	0	392	0	0	360
Caulobacteraceae	0.391625	0.683564	0.130435	0.0506586	0.113276	0	0	0	0	0	0	1	329	0.303951	0	282	0	0	233	0	0	271	0	0	322	0	0	288	0	0	280	0	0	355	0	0	361	0	0	459	0	0	389	0	0	392	0	0	360
Cardiobacteriaceae	0.553086	0.698636	0.0930935	0.0506586	0.113276	0.0363108	0.0811935	0	0	0	0	1	329	0.303951	0	282	0	0	233	0	0	271	0	0	322	0	0	288	0	0	280	0	0	355	0	0	361	0	1	459	0.217865	0	389	0	0	392	0	0	360
AD3_fa	0.000473479	0.045454	0.763429	0	0	0.231468	0.111588	0	0	0	0	0	329	0	0	282	0	0	233	0	0	271	0	0	322	0	0	288	0	1	280	0.357143	1	355	0.28169	1	361	0.277008	1	459	0.217865	0	389	0	1	392	0.255102	0	360
Spirochaetaceae	0.00909551	0.145528	0.404417	0	0	0.0428449	0.0958041	0.264875	0.120333	0.327335	0.302789	0	329	0	0	282	0	0	233	0	0	271	0	0	322	0	0	288	0	0	280	0	0	355	0	0	361	0	0	459	0	1	389	0.257069	0	392	0	1	360
Pseudoalteromonadaceae	0.00705069	0.169217	0.516974	0	0	0	0	0.10613	0.150241	0.266481	0.147885	0	329	0	0	282	0	0	233	0	0	271	0	0	322	0	0	288	0	0	280	0	0	355	0	0	361	0	0	459	0	0	389	0	0	392	0	0	360
Lachnospirales_unclassified	0.0143535	0.172242	0.473234	0	0	0.042517	0.0950709	0.221511	0.159396	0.212609	0.0963296	0	329	0	0	282	0	0	233	0	0	271	0	0	322	0	0	288	0	0	280	0	0	355	0	0	361	0	0	459	0	0	389	0	1	392	0.255102	1	360
Coriobacteriales_unclassified	0.00413337	0.198402	0.549389	0	0	0.0791557	0.112514	0	0	0.256468	0.152748	0	329	0	0	282	0	0	233	0	0	271	0	0	322	0	0	288	0	0	280	0	0	355	0	0	361	0	1	459	0.217865	1	389	0.257069	0	392	0	0	360
Succinivibrionaceae	0.0384606	0.26373	0.346743	0	0	0	0	0.120209	0.170324	0.184981	0.137153	0	329	0	0	282	0	0	233	0	0	271	0	0	322	0	0	288	0	0	280	0	0	355	0	0	361	0	0	459	0	0	389	0	0	392	0	0	360
Saccharospirillaceae	0.0592918	0.29958	0.341785	0	0	0	0	0.169262	0.170587	0.0401606	0.0898019	0	329	0	0	282	0	0	233	0	0	271	0	0	322	0	0	288	0	0	280	0	0	355	0	0	361	0	0	459	0	0	389	0	0	392	0	0	360
Vibrionaceae	0.0995856	0.354082	0.272659	0	0	0	0	0.112449	0.159054	0	0	0	329	0	0	282	0	0	233	0	0	271	0	0	322	0	0	288	0	0	280	0	0	355	0	0	361	0	0	459	0	0	389	0	0	392	0	0	360
Chitinophagaceae	0.0841856	0.367356	0.286063	0	0	0.129427	0.131047	0.0462963	0.103522	0	0	0	329	0	0	282	0	0	233	0	0	271	0	0	322	0	0	288	0	0	280	0	1	355	0.28169	1	361	0.277008	1	459	0.217865	0	389	0	0	392	0	1	360
Clostridia_vadinBB60_group_fa	0.0995856	0.367701	0.271998	0	0	0	0	0.097421	0.138028	0	0	0	329	0	0	282	0	0	233	0	0	271	0	0	322	0	0	288	0	0	280	0	0	355	0	0	361	0	0	459	0	0	389	0	0	392	0	1	360
Hungateiclostridiaceae	0.39563	0.643737	0.132226	0	0	0.134853	0.209324	0.112449	0.159054	0.0403551	0.0902368	0	329	0	0	282	0	0	233	0	0	271	0	0	322	0	0	288	0	0	280	0	0	355	0	2	361	0.554017	0	459	0	0	389	0	1	392	0.255102	0	360
Bacteria_unclassified	0.228638	0.665128	0.170116	0	0	0.0595238	0.133099	0.267631	0.286554	0.283275	0.45154	0	329	0	0	282	0	0	233	0	0	271	0	0	322	0	0	288	0	1	280	0.357143	0	355	0	0	361	0	0	459	0	0	389	0	0	392	0	0	360
Chthoniobacteraceae	0.391625	0.671357	0.130435	0	0	0.042517	0.0950709	0	0	0	0	0	329	0	0	282	0	0	233	0	0	271	0	0	322	0	0	288	0	0	280	0	0	355	0	0	361	0	0	459	0	0	389	0	1	392	0.255102	0	360
MB-A2-108_fa	0.391625	0.696223	0.130435	0	0	0	0	0.0550055	0.122996	0	0	0	329	0	0	282	0	0	233	0	0	271	0	0	322	0	0	288	0	0	280	0	0	355	0	0	361	0	0	459	0	0	389	0	0	392	0	0	360
WPS-2_fa	0.553086	0.707951	0.0923078	0	0	0.042517	0.0950709	0.055371	0.123813	0	0	0	329	0	0	282	0	0	233	0	0	271	0	0	322	0	0	288	0	0	280	0	0	355	0	0	361	0	0	459	0	0	389	0	1	392	0.255102	0	360
Chlamydiaceae	0.391625	0.709359	0.130435	0	0	0	0	0	0	0.0403551	0.0902368	0	329	0	0	282	0	0	233	0	0	271	0	0	322	0	0	288	0	0	280	0	0	355	0	0	361	0	0	459	0	0	389	0	0	392	0	0	360
RBG-13-54-9_fa	0.391625	0.723	0.130435	0	0	0	0	0.0550055	0.122996	0	0	0	329	0	0	282	0	0	233	0	0	271	0	0	322	0	0	288	0	0	280	0	0	355	0	0	361	0	0	459	0	0	389	0	0	392	0	0	360
Gemmatimonadaceae	0.553086	0.727347	0.0922405	0	0	0.042517	0.0950709	0.0550055	0.122996	0	0	0	329	0	0	282	0	0	233	0	0	271	0	0	322	0	0	288	0	0	280	0	0	355	0	0	361	0	0	459	0	0	389	0	1	392	0.255102	0	360
Neisseriaceae	0.391625	0.737177	0.130435	0	0	0	0	0	0	0.0403551	0.0902368	0	329	0	0	282	0	0	233	0	0	271	0	0	322	0	0	288	0	0	280	0	0	355	0	0	361	0	0	459	0	0	389	0	0	392	0	0	360
Deferribacteraceae	0.391625	0.75192	0.130435	0	0	0	0	0.055371	0.123813	0	0	0	329	0	0	282	0	0	233	0	0	271	0	0	322	0	0	288	0	0	280	0	0	355	0	0	361	0	0	459	0	0	389	0	0	392	0	0	360
Enterococcaceae	0.510253	0.753605	0.104346	0	0	0.0595238	0.133099	0.103374	0.147381	0.0401606	0.0898019	0	329	0	0	282	0	0	233	0	0	271	0	0	322	0	0	288	0	1	280	0.357143	0	355	0	0	361	0	0	459	0	0	389	0	0	392	0	1	360
Cellvibrionales_unclassified	0.553086	0.758519	0.0911025	0	0	0	0	0.0550055	0.122996	0.0606061	0.135519	0	329	0	0	282	0	0	233	0	0	271	0	0	322	0	0	288	0	0	280	0	0	355	0	0	361	0	0	459	0	0	389	0	0	392	0	0	360
Bacteroidia_unclassified	0.391625	0.767266	0.130435	0	0	0	0	0.102249	0.228637	0	0	0	329	0	0	282	0	0	233	0	0	271	0	0	322	0	0	288	0	0	280	0	0	355	0	0	361	0	0	459	0	0	389	0	0	392	0	0	360
Alphaproteobacteria_unclassified	0.553086	0.769512	0.0934988	0	0	0	0	0.0631313	0.141166	0.0438596	0.0980732	0	329	0	0	282	0	0	233	0	0	271	0	0	322	0	0	288	0	0	280	0	0	355	0	0	361	0	0	459	0	0	389	0	0	392	0	0	360
Comamonadaceae	0.549033	0.786674	0.0907152	0	0	0.042517	0.0950709	0.0511247	0.114318	0.0846094	0.119777	0	329	0	0	282	0	0	233	0	0	271	0	0	322	0	0	288	0	0	280	0	0	355	0	0	361	0	0	459	0	0	389	0	1	392	0.255102	0	360
[truncated: 34 more columns]

## Sheet: Genus
taxon	p-values	p-values (corrected)	HF: mean rel, freq, (%)	HF: std, dev, (%)	HFC: mean rel, freq, (%)	HFC: std, dev, (%)	ST: mean rel, freq, (%)	ST: std, dev, (%)	STC: mean rel, freq, (%)	STC: std, dev, (%)	HS116	HS116: parent seq, count	HS116: rel, freq, (%)	HS117	HS117: parent seq, count	HS117: rel, freq, (%)	HS118	HS118: parent seq, count	HS118: rel, freq, (%)	HS119	HS119: parent seq, count	HS119: rel, freq, (%)	HS120	HS120: parent seq, count	HS120: rel, freq, (%)	HS121	HS121: parent seq, count	HS121: rel, freq, (%)	HS122	HS122: parent seq, count	HS122: rel, freq, (%)	HS123	HS123: parent seq, count	HS123: rel, freq, (%)	HS124	HS124: parent seq, count	HS124: rel, freq, (%)	HS125	HS125: parent seq, count	HS125: rel, freq, (%)	HS126	HS126: parent seq, count	HS126: rel, freq, (%)	HS127	HS127: parent seq, count	HS127: rel, freq, (%)	HS092	HS092: parent seq, count	HS092: rel, freq, (%)
Lachnospiraceae_unclassified	0.217097	0.520476	22.1984	2.28512	23.1394	2.5951	19.6134	2.93069	22.1186	1.85283	81	329	24.6201	56	282	19.8582	55	233	23.6052	68	271	25.0923	64	322	19.8758	58	288	20.1389	57	280	20.3571	81	355	22.8169	102	361	28.2548	106	459	23.0937	92	389	23.6504	81	392	20.6633	84	360	23.3333
uncultured	0.432155	0.646504	7.23237	1.40567	7.67231	1.11335	8.33162	0.638376	7.42643	1.28962	21	329	6.38298	21	282	7.44681	11	233	4.72103	24	271	8.85609	28	322	8.69565	21	288	7.29167	24	280	8.57143	34	355	9.57746	27	361	7.47922	29	459	6.31808	29	389	7.45501	26	392	6.63265	30	360	8.33333
Muribaculaceae_ge	0.780294	0.815167	6.68761	1.27471	6.12924	1.15988	5.95584	1.63685	6.58105	0.810328	18	329	5.47112	14	282	4.96454	18	233	7.72532	16	271	5.90406	26	322	8.07453	23	288	7.98611	16	280	5.71429	22	355	6.19718	31	361	8.58726	23	459	5.01089	21	389	5.39846	23	392	5.86735	20	360	5.55556
Ruminococcaceae_unclassified	0.298156	0.655943	4.15175	0.852594	3.85817	0.791897	4.81788	1.30954	4.37886	0.23273	9	329	2.73556	13	282	4.60993	9	233	3.86266	15	271	5.53506	14	322	4.34783	11	288	3.81944	9	280	3.21429	14	355	3.94366	9	361	2.49307	22	459	4.79303	16	389	4.11311	18	392	4.59184	18	360	5
Lachnospiraceae_NK4A136_group	0.00149073	0.139384	3.42269	0.907643	5.13318	1.14117	2.43366	0.840795	5.17622	1.22308	16	329	4.86322	8	282	2.83688	6	233	2.57511	8	271	2.95203	9	322	2.79503	13	288	4.51389	9	280	3.21429	21	355	5.91549	25	361	6.92521	23	459	5.01089	20	389	5.14139	18	392	4.59184	15	360	4.16667
Oscillospiraceae_unclassified	0.0917897	0.336562	2.88728	0.656314	4.23549	0.760544	3.75269	1.34851	3.87755	0.522092	9	329	2.73556	11	282	3.90071	6	233	2.57511	5	271	1.84502	9	322	2.79503	10	288	3.47222	10	280	3.57143	20	355	5.6338	12	361	3.3241	18	459	3.92157	17	389	4.37018	18	392	4.59184	17	360	4.72222
Colidextribacter	0.355135	0.72185	2.53147	0.547866	1.98574	0.339426	2.23026	0.218639	2.09445	0.427616	11	329	3.34347	9	282	3.19149	5	233	2.14592	6	271	2.21402	6	322	1.86335	7	288	2.43056	4	280	1.42857	8	355	2.25352	6	361	1.66205	9	459	1.96078	9	389	2.31362	9	392	2.29592	8	360	2.22222
Bacteroides	0.447068	0.658281	2.32768	0.315472	2.33909	0.823622	1.90547	0.664062	1.78866	0.58849	6	329	1.82371	6	282	2.12766	6	233	2.57511	6	271	2.21402	9	322	2.79503	7	288	2.43056	11	280	3.92857	10	355	2.8169	8	361	2.21607	8	459	1.74292	7	389	1.79949	6	392	1.53061	6	360	1.66667
Oscillibacter	0.020847	0.229317	2.31146	0.358328	2.31637	0.190196	2.95883	0.435183	1.97985	0.445358	7	329	2.12766	8	282	2.83688	4	233	1.71674	7	271	2.58303	7	322	2.17391	7	288	2.43056	6	280	2.14286	9	355	2.53521	8	361	2.21607	11	459	2.39651	8	389	2.05656	10	392	2.55102	12	360	3.33333
Lachnoclostridium	0.00262049	0.163344	2.12456	0.410796	1.41276	0.346969	1.37516	0.246983	0.92411	0.264138	6	329	1.82371	6	282	2.12766	7	233	3.00429	5	271	1.84502	6	322	1.86335	6	288	2.08333	5	280	1.78571	7	355	1.97183	4	361	1.10803	6	459	1.30719	4	389	1.02828	5	392	1.27551	4	360	1.11111
Incertae_Sedis	0.449367	0.651408	2.1122	0.354541	1.90573	0.505147	2.33315	0.506923	2.24902	0.340869	7	329	2.12766	5	282	1.77305	6	233	2.57511	6	271	2.21402	5	322	1.5528	7	288	2.43056	3	280	1.07143	7	355	1.97183	5	361	1.38504	11	459	2.39651	9	389	2.31362	9	392	2.29592	10	360	2.77778
Clostridia_UCG-014_ge	0.67307	0.767463	1.82934	0.995013	2.21998	0.649628	2.19433	0.929059	2.68009	1.20138	5	329	1.51976	6	282	2.12766	8	233	3.43348	1	271	0.369004	8	322	2.48447	3	288	1.04167	5	280	1.78571	6	355	1.69014	8	361	2.21607	8	459	1.74292	9	389	2.31362	14	392	3.57143	7	360	1.94444
GCA-900066575	0.941616	0.946679	1.76403	0.671603	1.7747	0.352668	1.95093	0.497765	1.95304	0.380131	8	329	2.43161	7	282	2.48227	4	233	1.71674	2	271	0.738007	7	322	2.17391	3	288	1.04167	7	280	2.5	6	355	1.69014	5	361	1.38504	8	459	1.74292	7	389	1.79949	6	392	1.53061	5	360	1.38889
Allobaculum	0.111935	0.32706	1.54565	0.679964	0.806353	0.446119	1.20733	0.478396	0.843124	0.345348	2	329	0.607903	6	282	2.12766	3	233	1.28755	7	271	2.58303	3	322	0.931677	5	288	1.73611	5	280	1.78571	2	355	0.56338	2	361	0.554017	3	459	0.653595	3	389	0.771208	2	392	0.510204	2	360	0.555556
Clostridia_unclassified	0.590588	0.717143	1.19482	0.625937	1.35253	0.383919	1.03307	0.22102	1.04984	0.322277	8	329	2.43161	3	282	1.06383	3	233	1.28755	3	271	1.10701	3	322	0.931677	1	288	0.347222	2	280	0.714286	6	355	1.69014	6	361	1.66205	8	459	1.74292	5	389	1.28535	4	392	1.02041	3	360	0.833333
Oscillospirales_ge	0.101977	0.307576	1.15984	0.539677	0.825934	0.297585	0.489142	0.24813	0.815826	0.234841	3	329	0.911854	2	282	0.70922	4	233	1.71674	1	271	0.369004	6	322	1.86335	4	288	1.38889	3	280	1.07143	3	355	0.84507	4	361	1.10803	3	459	0.653595	1	389	0.257069	4	392	1.02041	1	360	0.277778
Blautia	0.00638338	0.170527	1.1496	0.446942	0.938077	0.12609	0.970116	0.266864	0.374571	0.179507	3	329	0.911854	3	282	1.06383	2	233	0.858369	2	271	0.738007	4	322	1.24224	6	288	2.08333	3	280	1.07143	3	355	0.84507	3	361	0.831025	5	459	1.08932	3	389	0.771208	4	392	1.02041	5	360	1.38889
Streptococcus	0.0888771	0.3324	1.03886	0.427671	0.661139	0.364256	1.10567	0.491541	0.617722	0.229401	4	329	1.21581	5	282	1.77305	2	233	0.858369	3	271	1.10701	3	322	0.931677	1	288	0.347222	4	280	1.42857	2	355	0.56338	2	361	0.554017	3	459	0.653595	1	389	0.257069	2	392	0.510204	3	360	0.833333
Eggerthellaceae_unclassified	0.045057	0.255323	1.01711	0.3778	1.60454	0.427581	0.968992	0.219339	1.64219	0.537418	6	329	1.82371	2	282	0.70922	2	233	0.858369	2	271	0.738007	3	322	0.931677	3	288	1.04167	4	280	1.42857	7	355	1.97183	6	361	1.66205	8	459	1.74292	8	389	2.05656	3	392	0.765306	4	360	1.11111
Alloprevotella	0.597683	0.721075	0.925939	0.65047	0.679614	0.353849	1.03279	0.836275	0.96349	1.36264	1	329	0.303951	4	282	1.41844	0	233	0	4	271	1.47601	2	322	0.621118	5	288	1.73611	2	280	0.714286	5	355	1.40845	1	361	0.277008	3	459	0.653595	2	389	0.514139	2	392	0.510204	1	360	0.277778
Anaerovoracaceae_unclassified	0.157275	0.420148	0.923003	0.224111	0.815184	0.227637	1.27349	0.333903	1.04187	0.226455	3	329	0.911854	2	282	0.70922	2	233	0.858369	2	271	0.738007	3	322	0.931677	4	288	1.38889	3	280	1.07143	2	355	0.56338	2	361	0.554017	3	459	0.653595	4	389	1.02828	4	392	1.02041	3	360	0.833333
Roseburia	0.0671678	0.299057	0.857921	0.181079	1.31354	0.410034	0.698428	0.186169	1.05145	0.439721	4	329	1.21581	2	282	0.70922	2	233	0.858369	2	271	0.738007	3	322	0.931677	2	288	0.694444	5	280	1.78571	3	355	0.84507	3	361	0.831025	5	459	1.08932	7	389	1.79949	6	392	1.53061	3	360	0.833333
Family_XIII_AD3011_group	0.49987	0.708149	0.825446	0.201422	0.671079	0.185581	0.869763	0.150012	0.759038	0.0484964	2	329	0.607903	3	282	1.06383	2	233	0.858369	3	271	1.10701	2	322	0.621118	2	288	0.694444	2	280	0.714286	3	355	0.84507	1	361	0.277008	3	459	0.653595	3	389	0.771208	3	392	0.765306	3	360	0.833333
RF39_ge	0.0259408	0.21091	0.808089	0.520521	0.387903	0.346451	0.448189	0.564058	1.23556	0.451759	0	329	0	2	282	0.70922	4	233	1.71674	3	271	1.10701	2	322	0.621118	2	288	0.694444	1	280	0.357143	0	355	0	0	361	0	2	459	0.43573	2	389	0.514139	4	392	1.02041	0	360	0
Christensenellaceae_R-7_group	0.269488	0.622151	0.798478	0.482513	0.814567	0.457273	1.33719	0.730962	0.765941	0.318518	1	329	0.303951	3	282	1.06383	4	233	1.71674	2	271	0.738007	2	322	0.621118	1	288	0.347222	4	280	1.42857	0	355	0	3	361	0.831025	5	459	1.08932	4	389	1.02828	2	392	0.510204	0	360	0
Lactobacillus	0.815766	0.842808	0.770264	0.289751	0.661827	0.242627	0.642693	0.359617	0.705755	0.246161	2	329	0.607903	2	282	0.70922	3	233	1.28755	2	271	0.738007	3	322	0.931677	1	288	0.347222	1	280	0.357143	4	355	1.12676	2	361	0.554017	3	459	0.653595	2	389	0.514139	3	392	0.765306	3	360	0.833333
UCG-005	0.00466553	0.174491	0.757482	0.575329	0.673294	0.235499	1.9122	0.480852	1.35702	0.482781	2	329	0.607903	0	282	0	1	233	0.429185	5	271	1.84502	2	322	0.621118	3	288	1.04167	2	280	0.714286	2	355	0.56338	3	361	0.831025	3	459	0.653595	1	389	0.257069	4	392	1.02041	6	360	1.66667
NK4A214_group	0.0956296	0.33741	0.737318	0.306958	1.04008	0.414097	0.880545	0.275976	1.31896	0.356014	4	329	1.21581	1	282	0.35461	2	233	0.858369	1	271	0.369004	3	322	0.931677	2	288	0.694444	2	280	0.714286	3	355	0.84507	2	361	0.554017	6	459	1.30719	7	389	1.79949	4	392	1.02041	2	360	0.555556
UCG-009	0.984746	0.984746	0.627202	0.195654	0.594189	0.279265	0.658668	0.280265	0.573123	0.302399	2	329	0.607903	2	282	0.70922	1	233	0.429185	2	271	0.738007	3	322	0.931677	1	288	0.347222	3	280	1.07143	1	355	0.28169	1	361	0.277008	3	459	0.653595	3	389	0.771208	2	392	0.510204	1	360	0.277778
Prevotellaceae_UCG-003	0.0313713	0.225632	0.61623	0.30622	0.182582	0.207843	0.663746	0.477783	0.39448	0.0956085	2	329	0.607903	1	282	0.35461	1	233	0.429185	1	271	0.369004	4	322	1.24224	2	288	0.694444	0	280	0	2	355	0.56338	1	361	0.277008	0	459	0	0	389	0	1	392	0.255102	1	360	0.277778
Ruminococcus	0.33307	0.707775	0.594794	0.415727	0.783827	0.264655	0.590226	0.192459	0.590342	0.272382	1	329	0.303951	1	282	0.35461	1	233	0.429185	4	271	1.47601	1	322	0.310559	2	288	0.694444	1	280	0.357143	4	355	1.12676	2	361	0.554017	4	459	0.87146	4	389	1.02828	3	392	0.765306	3	360	0.833333
Actinomyces	0.0108066	0.202084	0.575442	0.141974	0.268107	0.134345	0.486386	0.15383	0.181282	0.19405	2	329	0.607903	2	282	0.70922	1	233	0.429185	2	271	0.738007	2	322	0.621118	1	288	0.347222	1	280	0.357143	1	355	0.28169	1	361	0.277008	2	459	0.43573	1	389	0.257069	0	392	0	2	360	0.555556
Intestinimonas	0.0111981	0.190368	0.521154	0.1603	0.263675	0.134263	0.328006	0.0310498	0.229355	0.111241	1	329	0.303951	2	282	0.70922	1	233	0.429185	1	271	0.369004	2	322	0.621118	2	288	0.694444	1	280	0.357143	0	355	0	1	361	0.277008	2	459	0.43573	1	389	0.257069	1	392	0.255102	1	360	0.277778
Clostridium_sensu_stricto_1	0.0501534	0.275843	0.516341	0.147678	0.312726	0.177768	0.164433	0.167	0.280343	0.169532	2	329	0.607903	1	282	0.35461	1	233	0.429185	2	271	0.738007	2	322	0.621118	1	288	0.347222	1	280	0.357143	0	355	0	1	361	0.277008	1	459	0.217865	2	389	0.514139	2	392	0.510204	1	360	0.277778
UCG-003	0.56689	0.692866	0.505499	0.204437	0.395986	0.0977356	0.379131	0.1089	0.414731	0.171918	3	329	0.911854	1	282	0.35461	1	233	0.429185	1	271	0.369004	2	322	0.621118	1	288	0.347222	1	280	0.357143	1	355	0.28169	1	361	0.277008	2	459	0.43573	2	389	0.514139	2	392	0.510204	1	360	0.277778
Desulfovibrio	0.0266653	0.207767	0.489636	0.518872	0.290294	0.219178	0.873643	0.17599	0.49914	0.190212	5	329	1.51976	1	282	0.35461	0	233	0	1	271	0.369004	0	322	0	2	288	0.694444	0	280	0	1	355	0.28169	0	361	0	2	459	0.43573	2	389	0.514139	2	392	0.510204	3	360	0.833333
Lachnospiraceae_UCG-006	0.367164	0.715205	0.485453	0.224577	0.353469	0.0942246	0.316	0.178411	0.276719	0.157486	1	329	0.303951	1	282	0.35461	2	233	0.858369	2	271	0.738007	1	322	0.310559	1	288	0.347222	1	280	0.357143	1	355	0.28169	1	361	0.277008	2	459	0.43573	2	389	0.514139	1	392	0.255102	1	360	0.277778
Candidatus_Stoquefichus	0.0166142	0.207123	0.481823	0.214816	0.245152	0.238924	0.440455	0.168464	0.141516	0.147147	1	329	0.303951	1	282	0.35461	2	233	0.858369	1	271	0.369004	1	322	0.310559	2	288	0.694444	2	280	0.714286	1	355	0.28169	0	361	0	1	459	0.217865	1	389	0.257069	0	392	0	1	360	0.277778
Parabacteroides	0.319399	0.686525	0.480722	0.278073	0.333837	0.171383	0.218944	0.24673	0.29293	0.21469	2	329	0.607903	1	282	0.35461	2	233	0.858369	1	271	0.369004	0	322	0	2	288	0.694444	2	280	0.714286	1	355	0.28169	1	361	0.277008	1	459	0.217865	1	389	0.257069	1	392	0.255102	0	360	0
Collinsella	0.0552534	0.287011	0.45484	0.115996	0.264128	0.199369	0.399847	0.249029	0.104466	0.150557	2	329	0.607903	1	282	0.35461	1	233	0.429185	1	271	0.369004	2	322	0.621118	1	288	0.347222	1	280	0.357143	1	355	0.28169	0	361	0	2	459	0.43573	0	389	0	2	392	0.510204	0	360	0
Oscillospirales_unclassified	0.621541	0.721914	0.447143	0.367069	0.609667	0.258231	0.683768	0.287383	0.712122	0.43178	1	329	0.303951	2	282	0.70922	0	233	0	2	271	0.738007	3	322	0.931677	0	288	0	1	280	0.357143	1	355	0.28169	3	361	0.831025	3	459	0.653595	2	389	0.514139	4	392	1.02041	4	360	1.11111
Frisingicoccus	0.0411647	0.240556	0.413922	0.150559	0.185628	0.137661	0.276882	0.127304	0.108089	0.154542	1	329	0.303951	1	282	0.35461	1	233	0.429185	2	271	0.738007	1	322	0.310559	1	288	0.347222	1	280	0.357143	1	355	0.28169	0	361	0	1	459	0.217865	1	389	0.257069	0	392	0	1	360	0.277778
Marvinbryantia	0.0636776	0.290432	0.40308	0.0981704	0.346935	0.141304	0.644765	0.311956	0.313964	0.0885241	2	329	0.607903	1	282	0.35461	1	233	0.429185	1	271	0.369004	1	322	0.310559	1	288	0.347222	1	280	0.357143	1	355	0.28169	1	361	0.277008	3	459	0.653595	1	389	0.257069	1	392	0.255102	3	360	0.833333
Muribaculaceae_unclassified	0.857343	0.876083	0.398349	0.334561	0.561654	0.286065	0.543464	0.250236	0.478106	0.195318	3	329	0.911854	1	282	0.35461	1	233	0.429185	0	271	0	0	322	0	2	288	0.694444	3	280	1.07143	2	355	0.56338	1	361	0.277008	2	459	0.43573	1	389	0.257069	3	392	0.765306	2	360	0.555556
Rhodobacteraceae_unclassified	0.0789052	0.335347	0.379405	0.320748	0.195485	0.141676	0	0	0.141316	0.202862	0	329	0	1	282	0.35461	2	233	0.858369	1	271	0.369004	0	322	0	2	288	0.694444	1	280	0.357143	1	355	0.28169	1	361	0.277008	0	459	0	1	389	0.257069	0	392	0	0	360	0
Firmicutes_unclassified	0.656965	0.753696	0.354009	0.308604	0.289966	0.263473	0.281345	0.229353	0.169144	0.185604	2	329	0.607903	0	282	0	2	233	0.858369	0	271	0	1	322	0.310559	1	288	0.347222	0	280	0	1	355	0.28169	0	361	0	2	459	0.43573	1	389	0.257069	3	392	0.765306	0	360	0
Sellimonas	0.0189873	0.221915	0.352422	0.041435	0.274313	0.0423778	0.383377	0.129465	0.189194	0.139666	1	329	0.303951	1	282	0.35461	1	233	0.429185	1	271	0.369004	1	322	0.310559	1	288	0.347222	1	280	0.357143	1	355	0.28169	1	361	0.277008	1	459	0.217865	1	389	0.257069	1	392	0.255102	1	360	0.277778
Adlercreutzia	0.0333278	0.222582	0.352422	0.041435	0.214789	0.0982374	0.221511	0.159396	0.273215	0.0432911	1	329	0.303951	1	282	0.35461	1	233	0.429185	1	271	0.369004	1	322	0.310559	1	288	0.347222	0	280	0	1	355	0.28169	1	361	0.277008	1	459	0.217865	1	389	0.257069	1	392	0.255102	1	360	0.277778
Eisenbergiella	0.0239056	0.235281	0.352422	0.041435	0.274313	0.0423778	0.328006	0.0310498	0.273215	0.0432911	1	329	0.303951	1	282	0.35461	1	233	0.429185	1	271	0.369004	1	322	0.310559	1	288	0.347222	1	280	0.357143	1	355	0.28169	1	361	0.277008	1	459	0.217865	1	389	0.257069	1	392	0.255102	1	360	0.277778
Rothia	0.0239056	0.248352	0.352422	0.041435	0.274313	0.0423778	0.328006	0.0310498	0.273215	0.0432911	1	329	0.303951	1	282	0.35461	1	233	0.429185	1	271	0.369004	1	322	0.310559	1	288	0.347222	1	280	0.357143	1	355	0.28169	1	361	0.277008	1	459	0.217865	1	389	0.257069	1	392	0.255102	1	360	0.277778
Tuzzerella	0.0605431	0.297936	0.352422	0.041435	0.274313	0.0423778	0.270929	0.124911	0.273215	0.0432911	1	329	0.303951	1	282	0.35461	1	233	0.429185	1	271	0.369004	1	322	0.310559	1	288	0.347222	1	280	0.357143	1	355	0.28169	1	361	0.277008	1	459	0.217865	1	389	0.257069	1	392	0.255102	1	360	0.277778
Candidatus_Soleaferrea	0.0761068	0.330976	0.352422	0.041435	0.274313	0.0423778	0.164433	0.167	0.23286	0.111918	1	329	0.303951	1	282	0.35461	1	233	0.429185	1	271	0.369004	1	322	0.310559	1	288	0.347222	1	280	0.357143	1	355	0.28169	1	361	0.277008	1	459	0.217865	1	389	0.257069	1	392	0.255102	1	360	0.277778
Erysipelatoclostridium	0.17312	0.443472	0.352422	0.041435	0.227365	0.110109	0.311171	0.162455	0.411107	0.231617	1	329	0.303951	1	282	0.35461	1	233	0.429185	1	271	0.369004	1	322	0.310559	1	288	0.347222	1	280	0.357143	0	355	0	1	361	0.277008	1	459	0.217865	1	389	0.257069	1	392	0.255102	2	360	0.555556
Holdemania	0.0885777	0.338042	0.350023	0.208763	0.274313	0.0423778	0.224633	0.160266	0.128394	0.129165	1	329	0.303951	2	282	0.70922	1	233	0.429185	0	271	0	1	322	0.310559	1	288	0.347222	1	280	0.357143	1	355	0.28169	1	361	0.277008	1	459	0.217865	1	389	0.257069	1	392	0.255102	0	360	0
Helicobacter	0.356243	0.708697	0.338761	0.201843	0.240392	0.280252	0.537977	0.30092	0.323583	0.268447	1	329	0.303951	1	282	0.35461	0	233	0	1	271	0.369004	1	322	0.310559	2	288	0.694444	2	280	0.714286	0	355	0	0	361	0	1	459	0.217865	0	389	0	2	392	0.510204	2	360	0.555556
Veillonella	0.597878	0.716687	0.332651	0.181066	0.199589	0.217052	0.212802	0.222747	0.273215	0.0432911	1	329	0.303951	1	282	0.35461	0	233	0	1	271	0.369004	2	322	0.621118	1	288	0.347222	1	280	0.357143	2	355	0.56338	1	361	0.277008	0	459	0	0	389	0	0	392	0	2	360	0.555556
Butyricimonas	0.741316	0.805966	0.332651	0.181066	0.459613	0.159752	0.332253	0.194075	0.350696	0.183941	1	329	0.303951	1	282	0.35461	0	233	0	1	271	0.369004	2	322	0.621118	1	288	0.347222	2	280	0.714286	2	355	0.56338	1	361	0.277008	2	459	0.43573	1	389	0.257069	2	392	0.510204	1	360	0.277778
Angelakisella	0.0611568	0.293239	0.301763	0.139496	0.0886851	0.125579	0.161501	0.161707	0.100961	0.147026	0	329	0	1	282	0.35461	1	233	0.429185	1	271	0.369004	1	322	0.310559	1	288	0.347222	0	280	0	0	355	0	1	361	0.277008	0	459	0	0	389	0	1	392	0.255102	0	360	0
Dubosiella	0.147874	0.400759	0.301763	0.139496	0.228145	0.110474	0.109428	0.157477	0.212609	0.0963296	0	329	0	1	282	0.35461	1	233	0.429185	1	271	0.369004	1	322	0.310559	1	288	0.347222	1	280	0.357143	1	355	0.28169	0	361	0	1	459	0.217865	1	389	0.257069	1	392	0.255102	1	360	0.277778
Romboutsia	0.559314	0.688103	0.301763	0.139496	0.274313	0.0423778	0.221511	0.159396	0.317074	0.103006	0	329	0	1	282	0.35461	1	233	0.429185	1	271	0.369004	1	322	0.310559	1	288	0.347222	1	280	0.357143	1	355	0.28169	1	361	0.277008	1	459	0.217865	1	389	0.257069	1	392	0.255102	1	360	0.277778
Peptococcus	0.842614	0.865763	0.300662	0.139449	0.319876	0.263172	0.393793	0.231779	0.404913	0.130728	1	329	0.303951	1	282	0.35461	1	233	0.429185	1	271	0.369004	0	322	0	1	288	0.347222	2	280	0.714286	0	355	0	0	361	0	2	459	0.43573	2	389	0.514139	1	392	0.255102	0	360	0
Anaerovorax	0.205969	0.50021	0.294551	0.138071	0.181197	0.134898	0.118502	0.168126	0.172253	0.122635	1	329	0.303951	1	282	0.35461	1	233	0.429185	1	271	0.369004	1	322	0.310559	0	288	0	1	280	0.357143	0	355	0	0	361	0	1	459	0.217865	1	389	0.257069	1	392	0.255102	0	360	0
UCG-010_ge	0.617307	0.721478	0.290921	0.136341	0.274313	0.0423778	0.316	0.178411	0.41532	0.223274	1	329	0.303951	1	282	0.35461	1	233	0.429185	0	271	0	1	322	0.310559	1	288	0.347222	1	280	0.357143	1	355	0.28169	1	361	0.277008	1	459	0.217865	1	389	0.257069	1	392	0.255102	1	360	0.277778
Prevotellaceae_unclassified	0.488863	0.703211	0.287065	0.517996	0.360127	0.246996	0.389797	0.371235	0.475532	0.29309	1	329	0.303951	4	282	1.41844	0	233	0	0	271	0	0	322	0	0	288	0	1	280	0.357143	2	355	0.56338	0	361	0	1	459	0.217865	1	389	0.257069	3	392	0.765306	1	360	0.277778
Phascolarctobacterium	0.0324446	0.224709	0.280891	0.127743	0.0791557	0.112514	0.39321	0.257228	0.100767	0.14684	1	329	0.303951	1	282	0.35461	0	233	0	1	271	0.369004	1	322	0.310559	1	288	0.347222	0	280	0	0	355	0	0	361	0	1	459	0.217865	1	389	0.257069	0	392	0	1	360	0.277778
Parasutterella	0.110042	0.326632	0.280891	0.127743	0.274313	0.0423778	0.215558	0.155384	0.165125	0.116993	1	329	0.303951	1	282	0.35461	0	233	0	1	271	0.369004	1	322	0.310559	1	288	0.347222	1	280	0.357143	1	355	0.28169	1	361	0.277008	1	459	0.217865	1	389	0.257069	1	392	0.255102	1	360	0.277778
Coriobacteriaceae_unclassified	0.0242865	0.227079	0.270049	0.213988	0.0958346	0.141369	0	0	0	0	2	329	0.607903	1	282	0.35461	0	233	0	0	271	0	1	322	0.310559	1	288	0.347222	1	280	0.357143	0	355	0	0	361	0	1	459	0.217865	0	389	0	0	392	0	0	360	0
DNF00809	0.611466	0.723698	0.242792	0.175505	0.359675	0.115145	0.17558	0.176147	0.273609	0.14757	1	329	0.303951	1	282	0.35461	1	233	0.429185	1	271	0.369004	0	322	0	0	288	0	1	280	0.357143	1	355	0.28169	1	361	0.277008	1	459	0.217865	2	389	0.514139	2	392	0.510204	0	360	0
Mogibacterium	0.0819193	0.34042	0.24156	0.17474	0.274313	0.0423778	0.328006	0.0310498	0.398104	0.187912	1	329	0.303951	0	282	0	1	233	0.429185	1	271	0.369004	0	322	0	1	288	0.347222	1	280	0.357143	1	355	0.28169	1	361	0.277008	1	459	0.217865	1	389	0.257069	1	392	0.255102	1	360	0.277778
Gemella	0.35559	0.715004	0.239161	0.173065	0.227365	0.110109	0.221876	0.159647	0.128394	0.129165	1	329	0.303951	1	282	0.35461	1	233	0.429185	0	271	0	0	322	0	1	288	0.347222	1	280	0.357143	0	355	0	1	361	0.277008	1	459	0.217865	1	389	0.257069	1	392	0.255102	1	360	0.277778
Anaerovoracaceae_ge	0.612964	0.720908	0.23545	0.17155	0.400417	0.114714	0.384819	0.30947	0.296629	0.17364	1	329	0.303951	0	282	0	1	233	0.429185	1	271	0.369004	1	322	0.310559	0	288	0	1	280	0.357143	2	355	0.56338	1	361	0.277008	2	459	0.43573	2	389	0.514139	1	392	0.255102	1	360	0.277778
Flavonifractor	0.180223	0.455428	0.23182	0.168896	0.268107	0.134345	0.164799	0.167364	0.0474834	0.106176	1	329	0.303951	0	282	0	1	233	0.429185	0	271	0	1	322	0.310559	1	288	0.347222	1	280	0.357143	1	355	0.28169	1	361	0.277008	2	459	0.43573	1	389	0.257069	0	392	0	1	360	0.277778
Neptunomonas	0.0383099	0.247033	0.230232	0.163748	0.18452	0.136956	0.0570776	0.127629	0	0	0	329	0	1	282	0.35461	0	233	0	1	271	0.369004	1	322	0.310559	1	288	0.347222	1	280	0.357143	0	355	0	1	361	0.277008	1	459	0.217865	0	389	0	1	392	0.255102	0	360	0
Acetatifactor	0.419633	0.643209	0.226732	0.260607	0.185628	0.137661	0.055371	0.123813	0.091343	0.129331	1	329	0.303951	2	282	0.70922	0	233	0	0	271	0	0	322	0	1	288	0.347222	1	280	0.357143	1	355	0.28169	0	361	0	1	459	0.217865	1	389	0.257069	0	392	0	0	360	0
Rodentibacter	0.731166	0.809041	0.223021	0.15933	0.231796	0.11166	0.215923	0.155656	0.181872	0.135547	1	329	0.303951	1	282	0.35461	0	233	0	1	271	0.369004	1	322	0.310559	0	288	0	1	280	0.357143	1	355	0.28169	1	361	0.277008	1	459	0.217865	1	389	0.257069	0	392	0	1	360	0.277778
Faecalibaculum	0.353732	0.726901	0.222891	0.239594	0.477849	0.32348	0.449441	0.347506	0.216188	0.384575	0	329	0	0	282	0	0	233	0	1	271	0.369004	2	322	0.621118	1	288	0.347222	0	280	0	1	355	0.28169	3	361	0.831025	1	459	0.217865	3	389	0.771208	3	392	0.765306	2	360	0.555556
Pygmaiobacter	0.0839848	0.334152	0.21939	0.156179	0.121673	0.122339	0.270929	0.124911	0.212609	0.0963296	1	329	0.303951	1	282	0.35461	0	233	0	0	271	0	1	322	0.310559	1	288	0.347222	0	280	0	0	355	0	0	361	0	1	459	0.217865	1	389	0.257069	1	392	0.255102	1	360	0.277778
Monoglobus	0.117231	0.337265	0.188503	0.190312	0.559395	0.321489	0.14967	0.220423	0.380649	0.281677	0	329	0	1	282	0.35461	1	233	0.429185	0	271	0	0	322	0	1	288	0.347222	1	280	0.357143	0	355	0	2	361	0.554017	3	459	0.653595	3	389	0.771208	4	392	1.02041	2	360	0.555556
Pseudarthrobacter	0.181323	0.452098	0.18369	0.187215	0	0	0.108202	0.153368	0.171859	0.122405	1	329	0.303951	0	282	0	1	233	0.429185	1	271	0.369004	0	322	0	0	288	0	0	280	0	0	355	0	0	361	0	0	459	0	0	389	0	0	392	0	0	360	0
Family_XIII_UCG-001	0.766186	0.82343	0.18369	0.187215	0.264456	0.134351	0.164433	0.167	0.212609	0.0963296	1	329	0.303951	0	282	0	1	233	0.429185	1	271	0.369004	0	322	0	0	288	0	1	280	0.357143	1	355	0.28169	0	361	0	2	459	0.43573	1	389	0.257069	1	392	0.255102	1	360	0.277778
Carnobacteriaceae_unclassified	0.165701	0.436423	0.182392	0.185649	0.184848	0.137127	0.112083	0.15855	0	0	0	329	0	1	282	0.35461	1	233	0.429185	0	271	0	1	322	0.310559	0	288	0	1	280	0.357143	0	355	0	1	361	0.277008	1	459	0.217865	1	389	0.257069	0	392	0	0	360	0
UCG-007	0.676214	0.766376	0.182392	0.185649	0.184848	0.137127	0.230585	0.16383	0.165125	0.116993	0	329	0	1	282	0.35461	1	233	0.429185	0	271	0	1	322	0.310559	0	288	0	1	280	0.357143	0	355	0	1	361	0.277008	1	459	0.217865	1	389	0.257069	0	392	0	0	360	0
Hydrogenoanaerobacterium	0.144503	0.397383	0.181161	0.184524	0.148989	0.152091	0	0	0.0474834	0.106176	0	329	0	0	282	0	1	233	0.429185	0	271	0	1	322	0.310559	1	288	0.347222	1	280	0.357143	1	355	0.28169	0	361	0	0	459	0	0	389	0	1	392	0.255102	0	360	0
Lachnospiraceae_UCG-010	0.168265	0.437021	0.173949	0.178644	0.042517	0.0950709	0	0	0.0811049	0.114702	1	329	0.303951	0	282	0	1	233	0.429185	0	271	0	1	322	0.310559	0	288	0	0	280	0	0	355	0	0	361	0	0	459	0	0	389	0	1	392	0.255102	0	360	0
Acinetobacter	0.0841856	0.327973	0.172362	0.173256	0.0595238	0.133099	0	0	0	0	0	329	0	1	282	0.35461	0	233	0	1	271	0.369004	1	322	0.310559	0	288	0	1	280	0.357143	0	355	0	0	361	0	0	459	0	0	389	0	0	392	0	0	360	0
Erysipelotrichaceae_ge	0.602001	0.717033	0.171261	0.172393	0.0832592	0.119179	0.0631313	0.141166	0.0606061	0.135519	1	329	0.303951	1	282	0.35461	0	233	0	1	271	0.369004	0	322	0	0	288	0	0	280	0	1	355	0.28169	0	361	0	1	459	0.217865	0	389	0	0	392	0	0	360	0
Bacteroidales_RF16_group_ge	0.348312	0.723716	0.171131	0.171978	0.138352	0.14448	0.270929	0.124911	0.101356	0.147407	0	329	0	0	282	0	0	233	0	1	271	0.369004	1	322	0.310559	1	288	0.347222	1	280	0.357143	0	355	0	0	361	0	1	459	0.217865	0	389	0	1	392	0.255102	1	360	0.277778
Turicibacter	0.682694	0.769059	0.171131	0.171978	0.214789	0.0982374	0.101302	0.144054	0.23286	0.111918	0	329	0	0	282	0	0	233	0	1	271	0.369004	1	322	0.310559	1	288	0.347222	0	280	0	1	355	0.28169	1	361	0.277008	1	459	0.217865	1	389	0.257069	1	392	0.255102	1	360	0.277778
Alistipes	0.70856	0.788695	0.168732	0.169281	0.227365	0.110109	0.215923	0.155656	0.317194	0.185106	0	329	0	1	282	0.35461	0	233	0	0	271	0	1	322	0.310559	1	288	0.347222	1	280	0.357143	0	355	0	1	361	0.277008	1	459	0.217865	1	389	0.257069	1	392	0.255102	1	360	0.277778
Peptostreptococcus	0.00717957	0.167822	0.16152	0.162301	0.0791557	0.112514	0.328006	0.0310498	0.0811049	0.114702	1	329	0.303951	1	282	0.35461	0	233	0	0	271	0	1	322	0.310559	0	288	0	0	280	0	0	355	0	0	361	0	1	459	0.217865	1	389	0.257069	0	392	0	1	360	0.277778
Globicatella	0.447854	0.654286	0.16152	0.162301	0.0791557	0.112514	0.0550055	0.122996	0.0474834	0.106176	1	329	0.303951	1	282	0.35461	0	233	0	0	271	0	1	322	0.310559	0	288	0	0	280	0	0	355	0	0	361	0	1	459	0.217865	1	389	0.257069	0	392	0	0	360	0
Coriobacteriaceae_UCG-002	0.6258	0.722374	0.160289	0.160853	0.167841	0.119956	0.097421	0.138028	0.0846094	0.119777	1	329	0.303951	0	282	0	0	233	0	0	271	0	1	322	0.310559	1	288	0.347222	0	280	0	0	355	0	1	361	0.277008	1	459	0.217865	1	389	0.257069	1	392	0.255102	1	360	0.277778
Faecalibacterium	0.143289	0.399926	0.129401	0.184524	0.1853	0.137493	0	0	0.0809104	0.114429	0	329	0	0	282	0	1	233	0.429185	0	271	0	0	322	0	1	288	0.347222	1	280	0.357143	1	355	0.28169	0	361	0	1	459	0.217865	0	389	0	1	392	0.255102	0	360	0
Rikenellaceae_RC9_gut_group	0.381149	0.734792	0.129401	0.184524	0	0	0.312701	0.560202	0.127999	0.128813	0	329	0	0	282	0	1	233	0.429185	0	271	0	0	322	0	1	288	0.347222	0	280	0	0	355	0	0	361	0	0	459	0	0	389	0	0	392	0	0	360	0
Dorea	0.426606	0.64335	0.123291	0.17769	0.124996	0.126182	0.218579	0.154926	0.212609	0.0963296	0	329	0	0	282	0	1	233	0.429185	0	271	0	1	322	0.310559	0	288	0	0	280	0	0	355	0	1	361	0.277008	1	459	0.217865	0	389	0	1	392	0.255102	0	360	0
Alteromonas	0.439031	0.651578	0.123291	0.17769	0.0469484	0.10498	0.0462963	0.103522	0	0	0	329	0	0	282	0	1	233	0.429185	0	271	0	1	322	0.310559	0	288	0	0	280	0	1	355	0.28169	0	361	0	0	459	0	0	389	0	0	392	0	1	360	0.277778
Peptostreptococcaceae_unclassified	0.700358	0.784233	0.120602	0.170608	0.142003	0.147626	0.109428	0.157477	0.0407498	0.0911193	0	329	0	1	282	0.35461	0	233	0	1	271	0.369004	0	322	0	0	288	0	1	280	0.357143	0	355	0	1	361	0.277008	1	459	0.217865	0	389	0	0	392	0	1	360	0.277778
Asaia	0.0995856	0.332545	0.116972	0.165437	0	0	0	0	0	0	0	329	0	1	282	0.35461	0	233	0	0	271	0	0	322	0	1	288	0.347222	0	280	0	0	355	0	0	361	0	0	459	0	0	389	0	0	392	0	0	360	0
Corynebacterium	0.39563	0.616523	0.11326	0.161061	0	0	0.112083	0.15855	0.0407498	0.0911193	0	329	0	0	282	0	0	233	0	1	271	0.369004	1	322	0.310559	0	288	0	0	280	0	0	355	0	0	361	0	0	459	0	0	389	0	0	392	0	0	360	0
Escherichia-Shigella	0.420952	0.639984	0.11326	0.161061	0.105692	0.15125	0.0462963	0.103522	0	0	0	329	0	0	282	0	0	233	0	1	271	0.369004	1	322	0.310559	0	288	0	1	280	0.357143	0	355	0	1	361	0.277008	0	459	0	0	389	0	0	392	0	1	360	0.277778
UBA1819	0.0399165	0.240787	0.112159	0.159725	0.293945	0.161729	0.328006	0.0310498	0.168749	0.120265	1	329	0.303951	0	282	0	0	233	0	1	271	0.369004	0	322	0	0	288	0	0	280	0	1	355	0.28169	1	361	0.277008	2	459	0.43573	2	389	0.514139	1	392	0.255102	1	360	0.277778
Erysipelotrichaceae_unclassified	0.495027	0.706641	0.110861	0.157297	0.0886851	0.125579	0.0631313	0.141166	0	0	0	329	0	1	282	0.35461	0	233	0	0	271	0	1	322	0.310559	0	288	0	0	280	0	0	355	0	1	361	0.277008	0	459	0	0	389	0	1	392	0.255102	0	360	0
Alcaligenaceae_unclassified	0.91861	0.933587	0.110861	0.157297	0.185628	0.137661	0.163208	0.163543	0.185571	0.137399	0	329	0	1	282	0.35461	0	233	0	0	271	0	1	322	0.310559	0	288	0	1	280	0.357143	1	355	0.28169	0	361	0	1	459	0.217865	1	389	0.257069	0	392	0	0	360	0
Staphylococcus	0.0509625	0.272286	0.10976	0.155912	0.231468	0.111588	0.379131	0.1089	0.108089	0.154542	1	329	0.303951	1	282	0.35461	0	233	0	0	271	0	0	322	0	0	288	0	1	280	0.357143	1	355	0.28169	1	361	0.277008	1	459	0.217865	0	389	0	1	392	0.255102	1	360	0.277778
Actinobacteria_unclassified	0.0995856	0.315636	0.10976	0.155912	0	0	0	0	0	0	1	329	0.303951	1	282	0.35461	0	233	0	0	271	0	0	322	0	0	288	0	0	280	0	0	355	0	0	361	0	0	459	0	0	389	0	0	392	0	0	360	0
Butyricicoccus	0.737235	0.806216	0.10976	0.155912	0.0824789	0.117886	0.0550055	0.122996	0.141122	0.146873	1	329	0.303951	1	282	0.35461	0	233	0	0	271	0	0	322	0	0	288	0	0	280	0	0	355	0	1	361	0.277008	1	459	0.217865	0	389	0	0	392	0	0	360	0
Christensenellaceae_ge	0.940954	0.951126	0.10976	0.155912	0.125324	0.126522	0.103374	0.147381	0.0805158	0.113867	1	329	0.303951	1	282	0.35461	0	233	0	0	271	0	0	322	0	0	288	0	0	280	0	0	355	0	1	361	0.277008	1	459	0.217865	1	389	0.257069	0	392	0	1	360	0.277778
Bacteroidales_unclassified	0.362988	0.714512	0.10963	0.155401	0.0788278	0.111996	0.334644	0.330738	0.20859	0.22676	0	329	0	0	282	0	0	233	0	0	271	0	1	322	0.310559	1	288	0.347222	0	280	0	0	355	0	0	361	0	1	459	0.217865	0	389	0	1	392	0.255102	0	360	0
Prevotellaceae_NK3B31_group	0.523842	0.731033	0.108529	0.153991	0.172272	0.123536	0.102249	0.228637	0.249146	0.206248	1	329	0.303951	0	282	0	0	233	0	0	271	0	0	322	0	1	288	0.347222	0	280	0	1	355	0.28169	1	361	0.277008	1	459	0.217865	1	389	0.257069	0	392	0	0	360	0
Anaerotruncus	0.542593	0.746065	0.108529	0.153991	0.224482	0.231659	0.218579	0.154926	0.104466	0.150557	1	329	0.303951	0	282	0	0	233	0	0	271	0	0	322	0	1	288	0.347222	1	280	0.357143	0	355	0	2	361	0.554017	2	459	0.43573	0	389	0	0	392	0	0	360	0
Prevotella	0.732727	0.806	0.108529	0.153991	0.0461681	0.103235	0.118502	0.168126	0.141516	0.147147	1	329	0.303951	0	282	0	0	233	0	0	271	0	0	322	0	1	288	0.347222	0	280	0	0	355	0	1	361	0.277008	0	459	0	0	389	0	0	392	0	0	360	0
uncultured_ge	0.75617	0.817363	0.102418	0.144854	0.214789	0.0982374	0.101302	0.144054	0.212609	0.0963296	1	329	0.303951	0	282	0	0	233	0	0	271	0	1	322	0.310559	0	288	0	0	280	0	1	355	0.28169	1	361	0.277008	1	459	0.217865	1	389	0.257069	1	392	0.255102	1	360	0.277778
Akkermansia	0.553086	0.703586	0.101317	0.226552	0	0	0.0631313	0.141166	0	0	2	329	0.607903	0	282	0	0	233	0	0	271	0	0	322	0	0	288	0	0	280	0	0	355	0	0	361	0	0	459	0	0	389	0	0	392	0	0	360	0
Acetanaerobacterium	0.553086	0.733526	0.0715308	0.159948	0	0	0	0	0.0474834	0.106176	0	329	0	0	282	0	1	233	0.429185	0	271	0	0	322	0	0	288	0	0	280	0	0	355	0	0	361	0	0	459	0	0	389	0	0	392	0	0	360	0
Clostridium_sensu_stricto_3	0.391625	0.711009	0.0615006	0.13752	0	0	0	0	0	0	0	329	0	0	282	0	0	233	0	1	271	0.369004	0	322	0	0	288	0	0	280	0	0	355	0	0	361	0	0	459	0	0	389	0	0	392	0	0	360	0
Hungatella	0.774745	0.823167	0.0615006	0.13752	0.0461681	0.103235	0.0462963	0.103522	0	0	0	329	0	0	282	0	0	233	0	1	271	0.369004	0	322	0	0	288	0	0	280	0	0	355	0	1	361	0.277008	0	459	0	0	389	0	0	392	0	1	360	0.277778
Sideroxydans	0.553086	0.708405	0.0591017	0.132155	0	0	0	0	0.0474834	0.106176	0	329	0	1	282	0.35461	0	233	0	0	271	0	0	322	0	0	288	0	0	280	0	0	355	0	0	361	0	0	459	0	0	389	0	0	392	0	0	360	0
ASF356	0.549033	0.74941	0.0591017	0.132155	0.042517	0.0950709	0	0	0.0846094	0.119777	0	329	0	1	282	0.35461	0	233	0	0	271	0	0	322	0	0	288	0	0	280	0	0	355	0	0	361	0	0	459	0	0	389	0	1	392	0.255102	0	360	0
Eubacterium	0.774745	0.827871	0.0591017	0.132155	0.0428449	0.0958041	0.0550055	0.122996	0	0	0	329	0	1	282	0.35461	0	233	0	0	271	0	0	322	0	0	288	0	0	280	0	0	355	0	0	361	0	0	459	0	1	389	0.257069	0	392	0	0	360	0
Bifidobacterium	0.0980919	0.339689	0.0578704	0.129402	0	0	0.158379	0.159615	0	0	0	329	0	0	282	0	0	233	0	0	271	0	0	322	0	1	288	0.347222	0	280	0	0	355	0	0	361	0	0	459	0	0	389	0	0	392	0	1	360	0.277778
Fibrobacter	0.391625	0.642403	0.0578704	0.129402	0	0	0	0	0	0	0	329	0	0	282	0	0	233	0	0	271	0	0	322	0	1	288	0.347222	0	280	0	0	355	0	0	361	0	0	459	0	0	389	0	0	392	0	0	360	0
Anaerofustis	0.537574	0.744639	0.0578704	0.129402	0.0363108	0.0811935	0.0550055	0.122996	0.131504	0.132114	0	329	0	0	282	0	0	233	0	0	271	0	0	322	0	1	288	0.347222	0	280	0	0	355	0	0	361	0	1	459	0.217865	0	389	0	0	392	0	0	360	0
Parvimonas	0.774745	0.818516	0.0578704	0.129402	0.0363108	0.0811935	0.0550055	0.122996	0	0	0	329	0	0	282	0	0	233	0	0	271	0	0	322	0	1	288	0.347222	0	280	0	0	355	0	0	361	0	1	459	0.217865	0	389	0	0	392	0	0	360	0
Odoribacter	0.798616	0.829673	0.0578704	0.129402	0.042517	0.0950709	0.114256	0.162915	0.100767	0.14684	0	329	0	0	282	0	0	233	0	0	271	0	0	322	0	1	288	0.347222	0	280	0	0	355	0	0	361	0	0	459	0	0	389	0	1	392	0.255102	0	360	0
Anaerovibrio	0.00479585	0.149471	0.0517598	0.115739	0.274313	0.0423778	0	0	0.0840203	0.118995	0	329	0	0	282	0	0	233	0	0	271	0	1	322	0.310559	0	288	0	1	280	0.357143	1	355	0.28169	1	361	0.277008	1	459	0.217865	1	389	0.257069	1	392	0.255102	0	360	0
Paludicola	0.0824999	0.33538	0.0517598	0.115739	0.293617	0.160764	0.254094	0.197758	0.358019	0.180265	0	329	0	0	282	0	0	233	0	0	271	0	1	322	0.310559	0	288	0	0	280	0	1	355	0.28169	1	361	0.277008	2	459	0.43573	1	389	0.257069	2	392	0.510204	2	360	0.555556
Fusobacterium	0.300413	0.653223	0.0517598	0.115739	0.125324	0.126522	0.0462963	0.103522	0	0	0	329	0	0	282	0	0	233	0	0	271	0	1	322	0.310559	0	288	0	0	280	0	0	355	0	1	361	0.277008	1	459	0.217865	1	389	0.257069	0	392	0	1	360	0.277778
Candidatus_Saccharimonas	0.334945	0.70376	0.0517598	0.115739	0.121673	0.122339	0.055371	0.123813	0.205286	0.166863	0	329	0	0	282	0	0	233	0	0	271	0	1	322	0.310559	0	288	0	0	280	0	0	355	0	0	361	0	1	459	0.217865	1	389	0.257069	1	392	0.255102	0	360	0
Ellin6055	0.553086	0.713291	0.0517598	0.115739	0	0	0	0	0.0407498	0.0911193	0	329	0	0	282	0	0	233	0	0	271	0	1	322	0.310559	0	288	0	0	280	0	0	355	0	0	361	0	0	459	0	0	389	0	0	392	0	0	360	0
Rhodococcus	0.553086	0.718244	0.0517598	0.115739	0	0	0	0	0.0606061	0.135519	0	329	0	0	282	0	0	233	0	0	271	0	1	322	0.310559	0	288	0	0	280	0	0	355	0	0	361	0	0	459	0	0	389	0	0	392	0	0	360	0
Erysipelotrichales_unclassified	0.774745	0.813918	0.0517598	0.115739	0.0428449	0.0958041	0.0550055	0.122996	0	0	0	329	0	0	282	0	0	233	0	0	271	0	1	322	0.310559	0	288	0	0	280	0	0	355	0	0	361	0	0	459	0	1	389	0.257069	0	392	0	0	360	0
Enterorhabdus	0.27342	0.623531	0.0506586	0.113276	0.178478	0.126569	0.0462963	0.103522	0.168749	0.120265	1	329	0.303951	0	282	0	0	233	0	0	271	0	0	322	0	0	288	0	0	280	0	1	355	0.28169	1	361	0.277008	0	459	0	1	389	0.257069	1	392	0.255102	1	360	0.277778
Brevundimonas	0.391625	0.648088	0.0506586	0.113276	0	0	0	0	0	0	1	329	0.303951	0	282	0	0	233	0	0	271	0	0	322	0	0	288	0	0	280	0	0	355	0	0	361	0	0	459	0	0	389	0	0	392	0	0	360	0
AD3_ge	0.000473479	0.0885405	0	0	0.231468	0.111588	0	0	0	0	0	329	0	0	282	0	0	233	0	0	271	0	0	322	0	0	288	0	1	280	0.357143	1	355	0.28169	1	361	0.277008	1	459	0.217865	0	389	0	1	392	0.255102	0	360	0
Treponema	0.00909551	0.188984	0	0	0.0428449	0.0958041	0.264875	0.120333	0.327335	0.302789	0	329	0	0	282	0	0	233	0	0	271	0	0	322	0	0	288	0	0	280	0	0	355	0	0	361	0	0	459	0	1	389	0.257069	0	392	0	1	360	0.277778
Oribacterium	0.0122048	0.190191	0	0	0	0	0.20987	0.1498	0.249854	0.19929	0	329	0	0	282	0	0	233	0	0	271	0	0	322	0	0	288	0	0	280	0	0	355	0	0	361	0	0	459	0	0	389	0	0	392	0	1	360	0.277778
Coriobacteriales_unclassified	0.00413337	0.193235	0	0	0.0791557	0.112514	0	0	0.256468	0.152748	0	329	0	0	282	0	0	233	0	0	271	0	0	322	0	0	288	0	0	280	0	0	355	0	0	361	0	1	459	0.217865	1	389	0.257069	0	392	0	0	360	0
Lachnospiraceae_UCG-001	0.0266713	0.199502	0	0	0.168621	0.120677	0	0	0.175952	0.196723	0	329	0	0	282	0	0	233	0	0	271	0	0	322	0	0	288	0	0	280	0	1	355	0.28169	0	361	0	1	459	0.217865	1	389	0.257069	1	392	0.255102	0	360	0
UCG-002	0.0153542	0.205088	0	0	0.0788278	0.111996	0.207798	0.148027	0	0	0	329	0	0	282	0	0	233	0	0	271	0	0	322	0	0	288	0	0	280	0	0	355	0	0	361	0	1	459	0.217865	0	389	0	1	392	0.255102	1	360	0.277778
Lachnospirales_unclassified	0.0143535	0.20647	0	0	0.042517	0.0950709	0.221511	0.159396	0.212609	0.0963296	0	329	0	0	282	0	0	233	0	0	271	0	0	322	0	0	288	0	0	280	0	0	355	0	0	361	0	0	459	0	0	389	0	1	392	0.255102	1	360	0.277778
Pseudoalteromonas	0.0251853	0.214075	0	0	0	0	0.0511247	0.114318	0.165125	0.116993	0	329	0	0	282	0	0	233	0	0	271	0	0	322	0	0	288	0	0	280	0	0	355	0	0	361	0	0	459	0	0	389	0	0	392	0	0	360	0
Atopobiaceae_unclassified	0.0251853	0.224269	0	0	0	0	0.0631313	0.141166	0.168749	0.120265	0	329	0	0	282	0	0	233	0	0	271	0	0	322	0	0	288	0	0	280	0	0	355	0	0	361	0	0	459	0	0	389	0	0	392	0	0	360	0
Anaerobiospirillum	0.0384606	0.239738	0	0	0	0	0.120209	0.170324	0.184981	0.137153	0	329	0	0	282	0	0	233	0	0	271	0	0	322	0	0	288	0	0	280	0	0	355	0	0	361	0	0	459	0	0	389	0	0	392	0	0	360	0
Lachnospiraceae_UCG-002	0.0617467	0.288666	0	0	0.0469484	0.10498	0.21375	0.152536	0.141711	0.147279	0	329	0	0	282	0	0	233	0	0	271	0	0	322	0	0	288	0	0	280	0	1	355	0.28169	0	361	0	0	459	0	0	389	0	0	392	0	1	360	0.277778
Reinekea	0.0592918	0.299664	0	0	0	0	0.169262	0.170587	0.0401606	0.0898019	0	329	0	0	282	0	0	233	0	0	271	0	0	322	0	0	288	0	0	280	0	0	355	0	0	361	0	0	459	0	0	389	0	0	392	0	0	360	0
Sphingomonas	0.0995856	0.305287	0	0	0	0	0	0	0.100961	0.147026	0	329	0	0	282	0	0	233	0	0	271	0	0	322	0	0	288	0	0	280	0	0	355	0	0	361	0	0	459	0	0	389	0	0	392	0	0	360	0
Aliivibrio	0.0995856	0.310375	0	0	0	0	0.112449	0.159054	0	0	0	329	0	0	282	0	0	233	0	0	271	0	0	322	0	0	288	0	0	280	0	0	355	0	0	361	0	0	459	0	0	389	0	0	392	0	0	360	0
Clostridia_vadinBB60_group_ge	0.0995856	0.321078	0	0	0	0	0.097421	0.138028	0	0	0	329	0	0	282	0	0	233	0	0	271	0	0	322	0	0	288	0	0	280	0	0	355	0	0	361	0	0	459	0	0	389	0	0	392	0	1	360	0.277778
Prevotellaceae_Ga6A1_group	0.0995856	0.326711	0	0	0.0897933	0.127186	0	0	0	0	0	329	0	0	282	0	0	233	0	0	271	0	0	322	0	0	288	0	0	280	0	1	355	0.28169	0	361	0	0	459	0	1	389	0.257069	0	392	0	0	360	0
Lachnospira	0.0988551	0.336107	0	0	0.171944	0.123313	0.0462963	0.103522	0.131698	0.132276	0	329	0	0	282	0	0	233	0	0	271	0	0	322	0	0	288	0	0	280	0	1	355	0.28169	1	361	0.277008	1	459	0.217865	0	389	0	1	392	0.255102	1	360	0.277778
Prevotellaceae_UCG-001	0.0952307	0.342464	0	0	0.0461681	0.103235	0.199088	0.214201	0.165125	0.116993	0	329	0	0	282	0	0	233	0	0	271	0	0	322	0	0	288	0	0	280	0	0	355	0	1	361	0.277008	0	459	0	0	389	0	0	392	0	2	360	0.555556
Subdoligranulum	0.126394	0.358116	0	0	0.167841	0.119956	0.0550055	0.122996	0.0846094	0.119777	0	329	0	0	282	0	0	233	0	0	271	0	0	322	0	0	288	0	0	280	0	0	355	0	1	361	0.277008	1	459	0.217865	1	389	0.257069	1	392	0.255102	0	360	0
Terrisporobacter	0.20219	0.497494	0	0	0.102041	0.147283	0	0	0.0809104	0.114429	0	329	0	0	282	0	0	233	0	0	271	0	0	322	0	0	288	0	1	280	0.357143	0	355	0	0	361	0	0	459	0	0	389	0	1	392	0.255102	0	360	0
Bacteria_unclassified	0.228638	0.541206	0	0	0.0595238	0.133099	0.267631	0.286554	0.283275	0.45154	0	329	0	0	282	0	0	233	0	0	271	0	0	322	0	0	288	0	1	280	0.357143	0	355	0	0	361	0	0	459	0	0	389	0	0	392	0	0	360	0
Hungateiclostridiaceae_unclassified	0.39563	0.611428	0	0	0.134853	0.209324	0.112449	0.159054	0.0403551	0.0902368	0	329	0	0	282	0	0	233	0	0	271	0	0	322	0	0	288	0	0	280	0	0	355	0	2	361	0.554017	0	459	0	0	389	0	1	392	0.255102	0	360	0
Psychrosphaera	0.262033	0.612502	0	0	0	0	0.0550055	0.122996	0.101356	0.147407	0	329	0	0	282	0	0	233	0	0	271	0	0	322	0	0	288	0	0	280	0	0	355	0	0	361	0	0	459	0	0	389	0	0	392	0	0	360	0
Ruminococcaceae_ge	0.391625	0.615411	0	0	0	0	0.055371	0.123813	0	0	0	329	0	0	282	0	0	233	0	0	271	0	0	322	0	0	288	0	0	280	0	0	355	0	0	361	0	0	459	0	0	389	0	0	392	0	0	360	0
Anaerosporobacter	0.391625	0.620626	0	0	0.042517	0.0950709	0	0	0	0	0	329	0	0	282	0	0	233	0	0	271	0	0	322	0	0	288	0	0	280	0	0	355	0	0	361	0	0	459	0	0	389	0	1	392	0.255102	0	360	0
Comamonadaceae_unclassified	0.391625	0.625931	0	0	0.042517	0.0950709	0	0	0	0	0	329	0	0	282	0	0	233	0	0	271	0	0	322	0	0	288	0	0	280	0	0	355	0	0	361	0	0	459	0	0	389	0	1	392	0.255102	0	360	0
Mucispirillum	0.391625	0.631327	0	0	0	0	0.055371	0.123813	0	0	0	329	0	0	282	0	0	233	0	0	271	0	0	322	0	0	288	0	0	280	0	0	355	0	0	361	0	0	459	0	0	389	0	0	392	0	0	360	0
Pseudoflavonifractor	0.391625	0.636817	0	0	0.0363108	0.0811935	0	0	0	0	0	329	0	0	282	0	0	233	0	0	271	0	0	322	0	0	288	0	0	280	0	0	355	0	0	361	0	1	459	0.217865	0	389	0	0	392	0	0	360	0
Anaerofilum	0.283038	0.637687	0	0	0.13868	0.144746	0.10613	0.150241	0.121266	0.12127	0	329	0	0	282	0	0	233	0	0	271	0	0	322	0	0	288	0	1	280	0.357143	0	355	0	0	361	0	1	459	0.217865	1	389	0.257069	0	392	0	0	360	0
Tyzzerella	0.287065	0.639061	0	0	0.0791557	0.112514	0	0	0.0474834	0.106176	0	329	0	0	282	0	0	233	0	0	271	0	0	322	0	0	288	0	0	280	0	0	355	0	0	361	0	1	459	0.217865	1	389	0.257069	0	392	0	0	360	0
Tannerellaceae_unclassified	0.391625	0.653874	0	0	0.0363108	0.0811935	0	0	0	0	0	329	0	0	282	0	0	233	0	0	271	0	0	322	0	0	288	0	0	280	0	0	355	0	0	361	0	1	459	0.217865	0	389	0	0	392	0	0	360	0
Erysipelotrichaceae_UCG-003	0.391625	0.659765	0	0	0	0	0.055371	0.123813	0	0	0	329	0	0	282	0	0	233	0	0	271	0	0	322	0	0	288	0	0	280	0	0	355	0	0	361	0	0	459	0	0	389	0	0	392	0	0	360	0
Chlamydia	0.391625	0.665763	0	0	0	0	0	0	0.0403551	0.0902368	0	329	0	0	282	0	0	233	0	0	271	0	0	322	0	0	288	0	0	280	0	0	355	0	0	361	0	0	459	0	0	389	0	0	392	0	0	360	0
dgA-11_gut_group	0.391625	0.671871	0	0	0	0	0	0	0.0403551	0.0902368	0	329	0	0	282	0	0	233	0	0	271	0	0	322	0	0	288	0	0	280	0	0	355	0	0	361	0	0	459	0	0	389	0	0	392	0	0	360	0
MB-A2-108_ge	0.391625	0.678092	0	0	0	0	0.0550055	0.122996	0	0	0	329	0	0	282	0	0	233	0	0	271	0	0	322	0	0	288	0	0	280	0	0	355	0	0	361	0	0	459	0	0	389	0	0	392	0	0	360	0
Lachnospiraceae_NC2004_group	0.391625	0.684429	0	0	0	0	0	0	0.0474834	0.106176	0	329	0	0	282	0	0	233	0	0	271	0	0	322	0	0	288	0	0	280	0	0	355	0	0	361	0	0	459	0	0	389	0	0	392	0	0	360	0
Actinomycetaceae_unclassified	0.553086	0.684948	0	0	0.0595238	0.133099	0.0550055	0.122996	0	0	0	329	0	0	282	0	0	233	0	0	271	0	0	322	0	0	288	0	1	280	0.357143	0	355	0	0	361	0	0	459	0	0	389	0	0	392	0	0	360	0
WPS-2_ge	0.553086	0.689514	0	0	0.042517	0.0950709	0.055371	0.123813	0	0	0	329	0	0	282	0	0	233	0	0	271	0	0	322	0	0	288	0	0	280	0	0	355	0	0	361	0	0	459	0	0	389	0	1	392	0.255102	0	360	0
Candidatus_Udaeobacter	0.391625	0.690886	0	0	0.042517	0.0950709	0	0	0	0	0	329	0	0	282	0	0	233	0	0	271	0	0	322	0	0	288	0	0	280	0	0	355	0	0	361	0	0	459	0	0	389	0	1	392	0.255102	0	360	0
Lachnospiraceae_FCS020_group	0.553086	0.694142	0	0	0.0363108	0.0811935	0.0462963	0.103522	0	0	0	329	0	0	282	0	0	233	0	0	271	0	0	322	0	0	288	0	0	280	0	0	355	0	0	361	0	1	459	0.217865	0	389	0	0	392	0	1	360	0.277778
UCG-004	0.391625	0.697466	0	0	0	0	0	0	0.0401606	0.0898019	0	329	0	0	282	0	0	233	0	0	271	0	0	322	0	0	288	0	0	280	0	0	355	0	0	361	0	0	459	0	0	389	0	0	392	0	0	360	0
Gemmatimonas	0.553086	0.698832	0	0	0.042517	0.0950709	0.0550055	0.122996	0	0	0	329	0	0	282	0	0	233	0	0	271	0	0	322	0	0	288	0	0	280	0	0	355	0	0	361	0	0	459	0	0	389	0	1	392	0.255102	0	360	0
Rhodoferax	0.391625	0.704172	0	0	0	0	0	0	0.0438596	0.0980732	0	329	0	0	282	0	0	233	0	0	271	0	0	322	0	0	288	0	0	280	0	0	355	0	0	361	0	0	459	0	0	389	0	0	392	0	0	360	0
Enterococcus	0.510253	0.717424	0	0	0.0595238	0.133099	0.103374	0.147381	0.0401606	0.0898019	0	329	0	0	282	0	0	233	0	0	271	0	0	322	0	0	288	0	1	280	0.357143	0	355	0	0	361	0	0	459	0	0	389	0	0	392	0	1	360	0.277778
Bacteroidia_unclassified	0.391625	0.717979	0	0	0	0	0.102249	0.228637	0	0	0	329	0	0	282	0	0	233	0	0	271	0	0	322	0	0	288	0	0	280	0	0	355	0	0	361	0	0	459	0	0	389	0	0	392	0	0	360	0
Sutterella	0.553086	0.723267	0	0	0	0	0.055371	0.123813	0.0606061	0.135519	0	329	0	0	282	0	0	233	0	0	271	0	0	322	0	0	288	0	0	280	0	0	355	0	0	361	0	0	459	0	0	389	0	0	392	0	0	360	0
RBG-13-54-9_ge	0.391625	0.725088	0	0	0	0	0.0550055	0.122996	0	0	0	329	0	0	282	0	0	233	0	0	271	0	0	322	0	0	288	0	0	280	0	0	355	0	0	361	0	0	459	0	0	389	0	0	392	0	0	360	0
Carnobacterium	0.553086	0.72836	0	0	0	0	0.0631313	0.141166	0.0401606	0.0898019	0	329	0	0	282	0	0	233	0	0	271	0	0	322	0	0	288	0	0	280	0	0	355	0	0	361	0	0	459	0	0	389	0	0	392	0	0	360	0
Ferruginibacter	0.391625	0.732339	0	0	0.0363108	0.0811935	0	0	0	0	0	329	0	0	282	0	0	233	0	0	271	0	0	322	0	0	288	0	0	280	0	0	355	0	0	361	0	1	459	0.217865	0	389	0	0	392	0	0	360	0
Cellvibrionales_unclassified	0.553086	0.738765	0	0	0	0	0.0550055	0.122996	0.0606061	0.135519	0	329	0	0	282	0	0	233	0	0	271	0	0	322	0	0	288	0	0	280	0	0	355	0	0	361	0	0	459	0	0	389	0	0	392	0	0	360	0
Ruegeria	0.387479	0.739374	0	0	0.0363108	0.0811935	0.101667	0.144636	0.0805158	0.113867	0	329	0	0	282	0	0	233	0	0	271	0	0	322	0	0	288	0	0	280	0	0	355	0	0	361	0	1	459	0.217865	0	389	0	0	392	0	1	360	0.277778
Neisseriaceae_unclassified	0.391625	0.739736	0	0	0	0	0	0	0.0403551	0.0902368	0	329	0	0	282	0	0	233	0	0	271	0	0	322	0	0	288	0	0	280	0	0	355	0	0	361	0	0	459	0	0	389	0	0	392	0	0	360	0
Alphaproteobacteria_unclassified	0.553086	0.74408	0	0	0	0	0.0631313	0.141166	0.0438596	0.0980732	0	329	0	0	282	0	0	233	0	0	271	0	0	322	0	0	288	0	0	280	0	0	355	0	0	361	0	0	459	0	0	389	0	0	392	0	0	360	0
Polaromonas	0.553086	0.749472	0	0	0	0	0.0511247	0.114318	0.0407498	0.0911193	0	329	0	0	282	0	0	233	0	0	271	0	0	322	0	0	288	0	0	280	0	0	355	0	0	361	0	0	459	0	0	389	0	0	392	0	0	360	0
[truncated: 33 more columns]
