# Supplementary figures and images for: Chia flour combined with a high fat diet increases propionic acid production and improves the microbial richness and diversity in female Wistar rats
Source: Royal Society of Chemistry journal article supplement (doi:10.1039/d3fo01764h), 2023-01-01

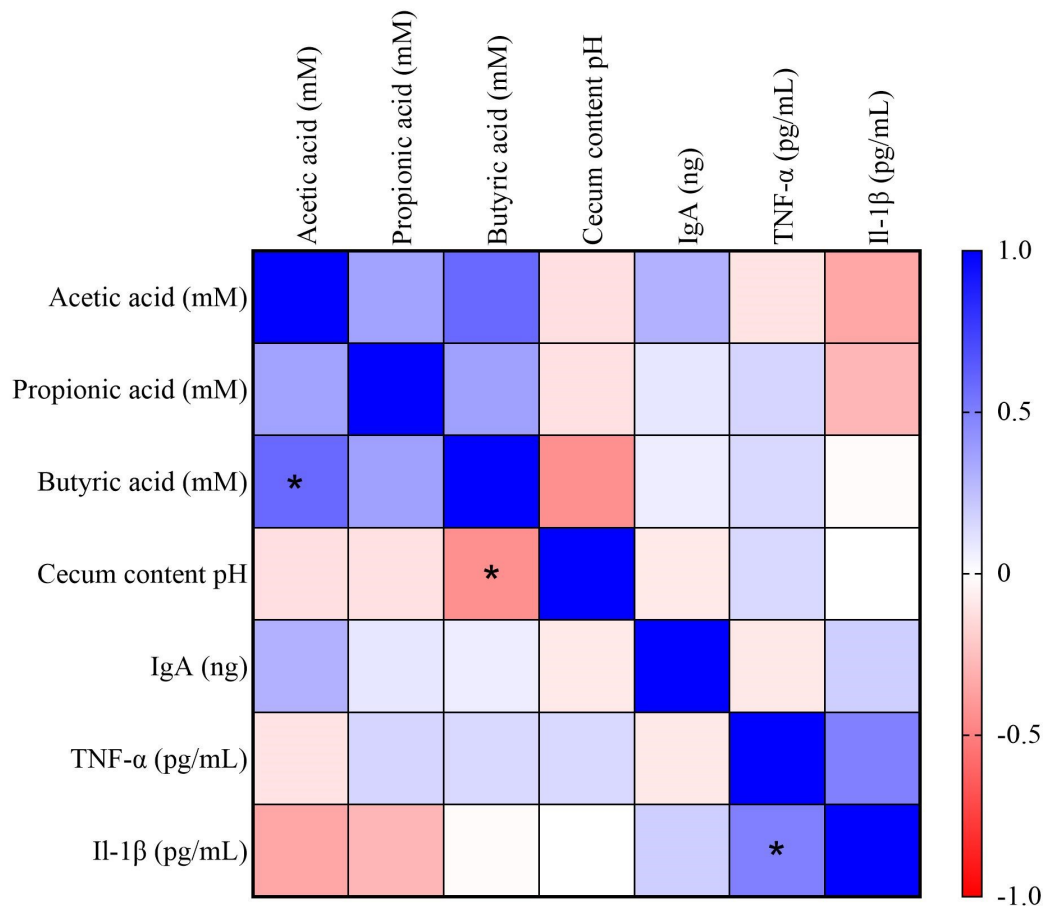

Supplement: d3fo01764h2.pdf [file d3fo01764h2.pdf]
